# Supplementary material for: Diagnosis and Treatment Strategies of Meniscus Root Tears: A Scoping Review
Source: PubMed Central journal article supplement — Orthop J Sports Med. 2024 Nov 1;12(11):23259671241283962. doi: 10.1177/23259671241283962 (PMC11531027; doi:10.1177/23259671241283962), 2024-11-01
Supplement: sj-pdf-1-ojs-10.1177_23259671241283962.pdf [file sj-pdf-1-ojs-10.1177_23259671241283962.pdf]

**Supplemental Table S1.** Studies Included in the Scoping Review on Diagnosis and Treatment Strategies for Meniscus Root Tears (N = 461)

| Study Title                                                                                                                                                                                                                                          | Lead Author  | Year | Level of Evidence | Country     | Design                              | Theme                            |
|------------------------------------------------------------------------------------------------------------------------------------------------------------------------------------------------------------------------------------------------------|--------------|------|-------------------|-------------|-------------------------------------|----------------------------------|
| A biomechanical comparison of all-inside versus transtibial meniscus root repair techniques                                                                                                                                                          | Pasic        | 2023 | 5                 | US          | Biomechanical human                 | Treatment/ Outcomes              |
| A case of bilateral posterior medial meniscus root tear: partial meniscectomy versus pull-out suture repair                                                                                                                                          | Patil        | 2015 | 4                 | India       | Case report                         | Treatment/ Outcomes              |
| A characteristic MRI finding to diagnose a partial tear of the medial meniscus posterior root: an ocarina sign                                                                                                                                       | Furumatsu    | 2021 | 4                 | Japan       | Comparative retrospective           | Diagnosis                        |
| A clinical sign to detect root avulsions of the posterior horn of the medial meniscus                                                                                                                                                                | Seil         | 2011 | 4                 | Luxembourg  | Case report                         | Diagnosis                        |
| A comparison of the transtibial pullout technique and all-inside meniscal repair in medial meniscus posterior root tear: prognostic factors and midterm clinical outcomes                                                                            | Dzidzishvili | 2021 | 3                 | Spain       | Case control                        | Treatment/ Outcomes              |
| A giraffe neck sign of the medial meniscus: a characteristic finding of the medial meniscus posterior root tear on magnetic resonance imaging                                                                                                        | Furumatsu    | 2017 | 3                 | Japan       | Case control                        | Diagnosis                        |
| A medial meniscal root pullout repair with the use of a tibial tunnel suturing technique                                                                                                                                                             | Apivatgaroon | 2016 | 5                 | Thailand    | Technical note                      | Technical note                   |
| A meta-analysis of clinical and radiographic outcomes of posterior horn medial meniscus root repairs                                                                                                                                                 | Chung        | 2016 | 4                 | South Korea | Meta-analysis                       | Treatment/ Outcomes              |
| A new aiming guide can create the tibial tunnel at favorable position in transtibial pullout repair for the medial meniscus posterior root tear                                                                                                      | Furumatsu    | 2017 | 4                 | Japan       | Nonrandomized controlled trial      | Treatment/ Outcomes              |
| A new arthroscopic classification of degenerative medial meniscus root tear that correlates with meniscus extrusion on magnetic resonance imaging                                                                                                    | Bin          | 2016 | 4                 | South Korea | Case series                         | Diagnosis                        |
| A new clinical sign for diagnosing medial meniscus posterior root tear                                                                                                                                                                               | Akmese       | 2021 | 2                 | Turkey      | Cohort                              | Diagnosis                        |
| A new surgical technique for arthroscopic repair of the meniscus root tear                                                                                                                                                                           | Nicholas     | 2009 | 5                 | US          | Technical note                      | Technical note                   |
| A newly-developed guide can create tibial tunnel at an optimal position during medial meniscus posterior root repairs                                                                                                                                | Hiranaka     | 2022 | 3                 | Japan       | Nonrandomized controlled trial      | Treatment/ Outcomes              |
| A novel arthroscopic classification of degenerative medial meniscus posterior root tears based on the tear gap                                                                                                                                       | Kim          | 2019 | 3                 | South Korea | Cohort                              | Diagnosis                        |
| A novel surgical technique for arthroscopic repair of type II posterior lateral meniscal root tear                                                                                                                                                   | Zhang        | 2020 | 3                 | China       | Cohort                              | Treatment/ Outcomes              |
| A novel suture technique to reduce the meniscus extrusion in the pullout repair for medial meniscus posterior root tears                                                                                                                             | Okazaki      | 2019 | 5                 | Japan       | Technical note                      | Technical note                   |
| A novel suture technique using the Fast-Fix combined with Ultrabraid for pullout repair of the medial meniscus posterior root tear                                                                                                                   | Fujii        | 2017 | 5                 | Japan       | Technical note                      | Technical note                   |
| A posterior anchoring method decreases pullout suture translation of the medial meniscus posterior root repair during knee flexion                                                                                                                   | Okazaki      | 2022 | 3                 | Japan       | Cohort                              | Treatment/ Outcomes              |
| A posterior shiny-corner lesion of the tibia is observed in the early phase after medial meniscus posterior root tear                                                                                                                                | Okazaki      | 2022 | 4                 | Japan       | Case series                         | Diagnosis                        |
| A pull out suture for transection of the posterior horn of the medial meniscus: using a posterior trans-septal portal                                                                                                                                | Ahn          | 2007 | 5                 | South Korea | Technical note                      | Technical note                   |
| A repair technique using two simple stitches reduces the short-term postoperative medial meniscus extrusion after pullout repair for medial meniscus posterior root tear                                                                             | Hiranaka     | 2020 | 3                 | Japan       | Cohort                              | Treatment/ Outcomes              |
| A simple cinch is superior to a locking loop for meniscus root repair: a human biomechanical comparison of suture constructs in a transtibial pull-out model                                                                                         | Krych        | 2018 | 5                 | US          | Biomechanical human                 | Treatment/ Outcomes              |
| A spreading roots sign: characteristic sign of the preliminary stage of medial meniscus posterior root tear on magnetic resonance imaging                                                                                                            | Nakamura     | 2022 | 4                 | Japan       | Case series                         | Diagnosis                        |
| A systematic review of adverse events and complications after isolated posterior medial meniscus root repairs                                                                                                                                        | Jackson      | 2023 | 4                 | US          | Systematic review                   | Systematic review/ meta-analysis |
| A technique combining "U" shape suture and shared tunneling to treat the posterior cruciate ligament rupture and posterior root tears of the medial meniscus                                                                                         | Xue          | 2018 | 4                 | China       | Case series                         | Treatment/ Outcomes              |
| A transosseous bone bridge repair for posterior horn meniscal root tears during anterior cruciate ligament reconstruction                                                                                                                            | Frank        | 2017 | 5                 | US          | Technical note                      | Technical note                   |
| Abnormal tibial alignment is a risk factor for lateral meniscus posterior root tears in patients with anterior cruciate ligament ruptures                                                                                                            | Okoroha      | 2019 | 3                 | US          | Cohort                              | Treatment/ Outcomes              |
| Accuracy of the newly developed Zimmer Biomet Root Aiming guide in tibial tunnel creation compared with that of conventional guides                                                                                                                  | Hiranaka     | 2023 | 3                 | Japan       | Comparative retrospective           | Treatment/ Outcomes              |
| Accurate placement of a tibial tunnel significantly improves meniscal healing and clinical outcomes at 1-year after medial meniscus posterior root repair                                                                                            | Kamatsuki    | 2021 | 3                 | Japan       | Cohort                              | Treatment/ Outcomes              |
| Acute repair of meniscus root tear partially restores joint displacements as measured with magnetic resonance images and loading in a cadaveric porcine knee                                                                                         | Meadows      | 2023 | 5                 | US          | Biomechanical animal                | Treatment/ Outcomes              |
| Age and meniscal extrusion are determining factors of osteoarthritis progression after conservative treatments for medial meniscus posterior root tear                                                                                               | Kim          | 2022 | 3                 | South Korea | Cohort                              | Treatment/ Outcomes              |
| Age, male sex, higher posterior tibial slope, deep sulcus sign, bone bruises on the lateral femoral condyle, and concomitant medial meniscal tears are risk factors for lateral meniscal posterior root tears: a systematic review and meta-analysis | Wu           | 2022 | 4                 | China       | Systematic review and meta-analysis | Systematic review/ meta-analysis |
| All-inside repair for a root tear of the medial meniscus using a suture anchor                                                                                                                                                                       | Jung         | 2012 | 4                 | South Korea | Case series                         | Treatment/ Outcomes              |

| Study Title                                                                                                                                                                     | Lead Author  | Year | Level of Evidence | Country     | Design                    | Theme                            |
|---------------------------------------------------------------------------------------------------------------------------------------------------------------------------------|--------------|------|-------------------|-------------|---------------------------|----------------------------------|
| All-inside techniques for meniscal radial root tear repair                                                                                                                      | Mao          | 2020 | 5                 | Singapore   | Technical note            | Technical note                   |
| Altered tibiofemoral contact mechanics due to lateral meniscus posterior horn root avulsions and radial tears can be restored with in situ pull-out suture repairs              | LaPrade      | 2014 | 5                 | US          | Biomechanical human       | Treatment/ Outcomes              |
| Alternative techniques for lateral and medial posterior root meniscus repair without special instruments                                                                        | Helito       | 2020 | 5                 | Brazil      | Technical note            | Technical note                   |
| An all-inside repair technique for unstable type-IV lateral meniscal posterior root tear                                                                                        | Meng         | 2022 | 5                 | China       | Technical note            | Technical note                   |
| An MRI-based suspension bridge sign can predict an arthroscopically favorable meniscal healing following the medial meniscus posterior root repair                              | Furumatsu    | 2021 | 3                 | Japan       | Cohort                    | Diagnosis                        |
| Analysis of affecting factors of the fate of medial meniscus posterior root tear based on treatment strategies                                                                  | Lee          | 2021 | 3                 | South Korea | Cohort                    | Treatment/ Outcomes              |
| Anatomic reinforced medial meniscal root reconstruction with gracilis autograft                                                                                                 | Holmes       | 2019 | 5                 | US          | Technical note            | Technical note                   |
| Anterior medial meniscal root tears: a novel arthroscopic all inside repair                                                                                                     | Osti         | 2015 | 4                 | Italy       | Case series               | Treatment/ Outcomes              |
| Anterior meniscal root repair using a transtibial double-tunnel pullout technique                                                                                               | Menge        | 2016 | 5                 | US          | Technical note            | Technical note                   |
| Anterior meniscus root avulsion following intramedullary nailing for a tibial shaft fracture                                                                                    | Ellman       | 2015 | 4                 | US          | Case report               | Treatment/ Outcomes              |
| Are outcomes of acute meniscus root tear repair better than debridement or nonoperative management? a systematic review                                                         | Eseonu       | 2022 | 4                 | UK          | Systematic review         | Systematic review/ meta-analysis |
| Are root avulsions of the lateral meniscus associated with extrusion at the time of acute anterior cruciate ligament injury? A case control study                               | Pula         | 2014 | 2                 | US          | Cohort                    | Diagnosis                        |
| Arthritic progression secondary to meniscus root tear treated with knee arthroplasty demonstrates similar outcomes to primary osteoarthritis: a matched case-control comparison | Tagliero     | 2021 | 3                 | US          | Case control              | Treatment/ Outcomes              |
| Arthritis progression on serial MRIs following diagnosis of medial meniscal posterior horn root tear                                                                            | Krych        | 2018 | 3                 | US          | Cohort                    | Treatment/ Outcomes              |
| Arthroscopic all inside repair of the lateral meniscus root tear                                                                                                                | Ahn          | 2008 | 4                 | South Korea | Case series               | Treatment/ Outcomes              |
| Arthroscopic all-inside repair for a tear of posterior root of the medial meniscus: a technical note                                                                            | Choi         | 2009 | 5                 | South Korea | Technical note            | Technical note                   |
| Arthroscopic centralization of the extruded medial meniscus                                                                                                                     | Leafblad     | 2021 | 5                 | US          | Technical note            | Technical note                   |
| Arthroscopic centralization reduces extrusion of the medial meniscus with posterior root defect in the ACL reconstructed knee                                                   | Ueki         | 2023 | 5                 | US          | Biomechanical human       | Treatment/ Outcomes              |
| Arthroscopic centralization using knotless anchors for extruded medial meniscus                                                                                                 | Koga         | 2021 | 5                 | Japan       | Technical note            | Technical note                   |
| Arthroscopic direct meniscal extrusion reduction: surgical tips to reduce persistent meniscal extrusion in meniscal root repair                                                 | Chernchujit  | 2018 | 5                 | Thailand    | Technical note            | Technical note                   |
| Arthroscopic direct repair for a complete radial tear of the posterior root of the medial meniscus                                                                              | Wang         | 2011 | 5                 | South Korea | Technical note            | Technical note                   |
| Arthroscopic incidence of lateral meniscal root avulsion in patients with anterior cruciate ligament injury                                                                     | Ciatti       | 2021 | 3                 | Italy       | Cross sectional           | Treatment/ Outcomes              |
| Arthroscopic lateral meniscus root repair with soft suture anchor technique                                                                                                     | Prasathaporn | 2013 | 5                 | Thailand    | Technical note            | Technical note                   |
| Arthroscopic medial meniscal root reconstruction with gracilis autograft is safe and improves 2-year postoperative patient-reported outcomes                                    | Holmes       | 2022 | 4                 | US          | Case series               | Treatment/ Outcomes              |
| Arthroscopic medial meniscus posterior root fixation Using a modified Mason-Allen Stitch                                                                                        | Chung        | 2016 | 5                 | South Korea | Technical note            | Technical note                   |
| Arthroscopic medial meniscus posterior root reconstruction and pull-out repair combined technique for root tear of medial meniscus                                              | Ishikawa     | 2022 | 5                 | Japan       | Technical note            | Technical note                   |
| Arthroscopic medial meniscus posterior root reconstruction using auto-gracilis tendon                                                                                           | Lee          | 2017 | 5                 | South Korea | Technical note            | Technical note                   |
| Arthroscopic medial meniscus posterior root repair with centralization using knotless suture anchors                                                                            | Wu           | 2022 | 5                 | US          | Technical note            | Technical note                   |
| Arthroscopic meniscal healing following medial meniscus posterior root repair: a comparison between two suture materials                                                        | Okazaki      | 2022 | 3                 | Japan       | Comparative retrospective | Treatment/ Outcomes              |
| Arthroscopic pullout repair of posterior root tear of the medial meniscus: the anterior approach using medial collateral ligament pie-crusting release                          | Park         | 2010 | 5                 | South Korea | Technical note            | Technical note                   |
| Arthroscopic pullout suture repair of posterior root tear of the medial meniscus: radiographic and clinical results with a 2-year follow-up                                     | Lee          | 2009 | 4                 | South Korea | Case series               | Treatment/ Outcomes              |
| Arthroscopic repair of double radial tears of the lateral meniscus                                                                                                              | Leafblad     | 2019 | 5                 | US          | Technical note            | Technical note                   |
| Arthroscopic repair of posterior root tears of the lateral meniscus with all-suture anchor                                                                                      | Familiari    | 2022 | 5                 | Italy       | Technical note            | Technical note                   |
| arthroscopic repair of the "tibial avulsion triad"-ACL posterolateral bundle, PCL, and lateral meniscus posterior root: the triple tunnel technique                             | Dartus       | 2022 | 5                 | Canada      | Technical note            | Technical note                   |
| Arthroscopic repair of the posterior root of the medial meniscus using knotless suture anchor: a technical note                                                                 | Eun          | 2016 | 4                 | South Korea | Case series               | Treatment/ Outcomes              |
| Arthroscopic scoring system of meniscal healing following medial meniscus posterior root repair                                                                                 | Furumatsu    | 2019 | 4                 | Japan       | Case series               | Treatment/ Outcomes              |

| Study Title                                                                                                                                                                                                                                                        | Lead Author  | Year | Level of Evidence | Country     | Design                                | Theme                            |
|--------------------------------------------------------------------------------------------------------------------------------------------------------------------------------------------------------------------------------------------------------------------|--------------|------|-------------------|-------------|---------------------------------------|----------------------------------|
| Arthroscopic side-to-side repair for complete radial posterior lateral meniscus root tears                                                                                                                                                                         | Zhuo         | 2020 | 4                 | China       | Case series                           | Treatment/ Outcomes              |
| Arthroscopic suture anchor repair of posterior root attachment injury in medial meniscus: technical note                                                                                                                                                           | Kim          | 2009 | 5                 | South Korea | Technical note                        | Technical note                   |
| Arthroscopic suture anchor repair versus pullout suture repair in posterior root tear of the medial meniscus: a prospective comparison study                                                                                                                       | Kim          | 2011 | 3                 | South Korea | Prospective therapeutic comparative   | Treatment/ Outcomes              |
| Arthroscopic transosseous repair of a medial meniscal posterior-root tear                                                                                                                                                                                          | Gannon       | 2021 | 5                 | South Korea | Technical note                        | Technical note                   |
| Arthroscopic transtibial pull-out repair for meniscal posterior root tear: the slip knot technique                                                                                                                                                                 | Chen         | 2022 | 5                 | Taiwan      | Technical note                        | Technical note                   |
| Arthroscopic transtibial pull-out repair of medial meniscus posterior root tear with a whip running suture technique                                                                                                                                               | Kim          | 2021 | 5                 | South Korea | Technical note                        | Technical note                   |
| Arthroscopic transtibial pullout repair for posterior medial meniscus root tears: a systematic review of clinical, radiographic, and second-look arthroscopic results                                                                                              | Feucht       | 2015 | 4                 | Germany     | Systematic review                     | Systematic review/ meta-analysis |
| Arthroscopic transtibial pullout repair for posterior meniscus root tears                                                                                                                                                                                          | Feucht       | 2019 | 5                 | Germany     | Technical note                        | Technical note                   |
| Arthroscopic, suture anchor repair through a novel medial quadriceptal portal for medial meniscal root tear                                                                                                                                                        | Jung         | 2012 | 5                 | South Korea | Technical note                        | Technical note                   |
| Association between postoperative meniscal extrusion and clinical outcomes of the pullout fixation technique for medial meniscus posterior root tear                                                                                                               | Yanagisawa   | 2020 | 3                 | Japan       | Cohort                                | Treatment/ Outcomes              |
| Association between tears of the posterior root of the medial meniscus and far posterior femoral condyle osteoarthritis                                                                                                                                            | Sebro        | 2020 | 3                 | US          | Cohort                                | Diagnosis                        |
| Association between transtibial meniscus root repair and rate of meniscal healing and extrusion on postoperative magnetic resonance imaging: a prospective multicenter study                                                                                       | Krych        | 2021 | 4                 | US          | Case series                           | Diagnosis                        |
| Augmentation of a nonanatomical repair of a medial meniscus posterior root tear with centralization using three knotless anchors may be associated with less meniscal extrusion and better compressive load distribution in mid-flexion compared with non-anatomic | Amano        | 2023 | 5                 | Japan       | Biomechanical animal                  | Treatment/ Outcomes              |
| Augmentation of the pullout repair of a medial meniscus posterior root tear by arthroscopic centralization                                                                                                                                                         | Koga         | 2017 | 5                 | Japan       | Technical note                        | Technical note                   |
| Avulsion of both posterior meniscal roots associated with acute rupture of the anterior cruciate ligament                                                                                                                                                          | Mariani      | 2015 | 4                 | Italy       | Case report                           | Treatment/ Outcomes              |
| Avulsion of the anterior medial meniscus root: case report and surgical technique                                                                                                                                                                                  | Feucht       | 2015 | 4                 | Germany     | Case report                           | Treatment/ Outcomes              |
| Bilateral anterior cruciate ligament tear combined with medial meniscus posterior root tear                                                                                                                                                                        | Hiranaka     | 2019 | 4                 | Japan       | Case report                           | Treatment/ Outcomes              |
| Biomechanical and viscoelastic properties of different posterior meniscal root fixation techniques                                                                                                                                                                 | Forkel       | 2017 | 5                 | Germany     | Biomechanical animal                  | Treatment/ Outcomes              |
| Biomechanical assessment of disease outcome in surgical interventions for medial meniscal posterior root tears: a finite element analysis                                                                                                                          | Xu           | 2022 | 5                 | China       | Biomechanical finite element analysis | Treatment/ Outcomes              |
| Biomechanical comparison between suture anchor and transtibial pull-out repair for posterior medial meniscus root tears                                                                                                                                            | Feucht       | 2014 | 5                 | Germany     | Biomechanical animal                  | Treatment/ Outcomes              |
| Biomechanical comparison of an all-inside meniscal repair device construct versus pullout sutures for arthroscopic transtibial repair of posterior medial meniscus root tears: a matched-pair cadaveric study                                                      | Vertullo     | 2021 | 5                 | Australia   | Biomechanical human                   | Treatment/ Outcomes              |
| Biomechanical comparison of arthroscopic repair constructs for meniscal root tears                                                                                                                                                                                 | Anz          | 2014 | 5                 | US          | Biomechanical human                   | Treatment/ Outcomes              |
| Biomechanical comparison of four tibial fixation techniques for meniscal root sutures in posterior medial meniscus root repair: a porcine study                                                                                                                    | Wu           | 2020 | 5                 | Taiwan      | Biomechanical animal                  | Treatment/ Outcomes              |
| Biomechanical comparison of meniscus-suture constructs for pullout repair of medial meniscus posterior root tears                                                                                                                                                  | Okimura      | 2019 | 5                 | US          | Biomechanical animal                  | Treatment/ Outcomes              |
| Biomechanical consequences of a complete radial tear adjacent to the medial meniscus posterior root attachment site: in situ pull-out repair restores derangement of joint mechanics                                                                               | Padalecki    | 2014 | 5                 | US          | Biomechanical human                   | Treatment/ Outcomes              |
| Biomechanical consequences of a nonanatomic posterior medial meniscal root repair                                                                                                                                                                                  | LaPrade      | 2015 | 5                 | US          | Biomechanical human                   | Treatment/ Outcomes              |
| Biomechanical consequences of a posterior root tear of the lateral meniscus: stabilizing effect of the menisiofemoral ligament                                                                                                                                     | Forkel       | 2013 | 5                 | Germany     | Biomechanical animal                  | Treatment/ Outcomes              |
| Biomechanical consequences of a tear of the posterior root of the medial meniscus. Similar to total meniscectomy                                                                                                                                                   | Allaire      | 2008 | 5                 | US          | Biomechanical human                   | Treatment/ Outcomes              |
| Biomechanical consequences of a tear of the posterior root of the medial meniscus. Surgical technique                                                                                                                                                              | Harner       | 2009 | 5                 | US          | Biomechanical human                   | Treatment/ Outcomes              |
| Biomechanical consequences of anterior root detachment of the lateral meniscus and its reinsertion                                                                                                                                                                 | Espejo-Reina | 2022 | 5                 | Spain       | Biomechanical human                   | Treatment/ Outcomes              |
| Biomechanical evaluation of a transtibial pull-out meniscal root repair: challenging the bungee effect                                                                                                                                                             | Cerminara    | 2014 | 5                 | US          | Biomechanical human                   | Treatment/ Outcomes              |
| Biomechanical evaluation of an all-inside posterior medial meniscal root repair technique via suture fixation to the posterior cruciate ligament                                                                                                                   | Saltzman     | 2020 | 5                 | US          | Biomechanical human                   | Treatment/ Outcomes              |
| Biomechanical evaluation of different suture materials for arthroscopic transtibial pull-out repair of posterior meniscus root tears                                                                                                                               | Feucht       | 2015 | 5                 | Germany     | Biomechanical human                   | Treatment/ Outcomes              |

| Study Title                                                                                                                                                                                                               | Lead Author  | Year | Level of Evidence | Country     | Design                              | Theme                            |
|---------------------------------------------------------------------------------------------------------------------------------------------------------------------------------------------------------------------------|--------------|------|-------------------|-------------|-------------------------------------|----------------------------------|
| Biomechanical evaluation of different suture techniques for arthroscopic transtibial pull-out repair of posterior medial meniscus root tears                                                                              | Feucht       | 2013 | 5                 | Germany     | Biomechanical human                 | Treatment/ Outcomes              |
| Biomechanical evaluation of the transtibial pull-out technique for posterior medial meniscal root repairs using 1 and 2 transtibial bone tunnels                                                                          | LaPrade      | 2015 | 5                 | US          | Biomechanical human                 | Treatment/ Outcomes              |
| Both posterior root lateral-medial meniscus tears with anterior cruciate ligament rupture: the step-by-step systematic arthroscopic repair technique                                                                      | Chernchujit  | 2017 | 5                 | Thailand    | Technical note                      | Technical note                   |
| Changes in bone marrow lesions following root repair surgery using modified Mason-Allen stitches in medial meniscus posterior root tears                                                                                  | Chung        | 2022 | 4                 | South Korea | Cohort                              | Treatment/ Outcomes              |
| Characteristic location and rapid progression of medial femoral condylar chondral lesions accompanying medial meniscus posterior root tear                                                                                | Park         | 2019 | 3                 | South Korea | Comparative retrospective           | Treatment/ Outcomes              |
| Circumferential rim augmentation suture around the perimeniscal capsule decreases meniscal extrusion and progression of osteoarthritis in rabbit meniscus root tear model                                                 | Park         | 2022 | 5                 | South Korea | Biomechanical animal                | Treatment/ Outcomes              |
| Clinical and radiologic evaluation of arthroscopic medial meniscus root tear refixation: comparison of the modified Mason-Allen stitch and simple stitches                                                                | Lee          | 2014 | 3                 | South Korea | Comparative retrospective           | Treatment/ Outcomes              |
| Clinical and radiologic outcomes of patients with lax healing after medial meniscal root repair: comparison with subtotal meniscectomy                                                                                    | Kim          | 2019 | 3                 | South Korea | Comparative retrospective           | Treatment/ Outcomes              |
| Clinical and radiological outcomes of meniscal repair versus partial meniscectomy for medial meniscus root tears: a systematic review and meta-analysis                                                                   | Ro           | 2020 | 4                 | South Korea | Systematic review                   | Systematic review/ meta-analysis |
| Clinical and radiological results with second-look arthroscopic findings after open wedge high tibial osteotomy without arthroscopic procedures for medial meniscal root tears                                            | Lee          | 2018 | 4                 | South Korea | Case series                         | Treatment/ Outcomes              |
| Clinical evaluation of suture materials for transtibial pullout repair of medial meniscus posterior root tear                                                                                                             | Hiranaka     | 2022 | 3                 | Japan       | Comparative retrospective           | Treatment/ Outcomes              |
| Clinical evaluation of the root tear of the posterior horn of the medial meniscus in total knee arthroplasty for osteoarthritis                                                                                           | Choi         | 2015 | 3                 | South Korea | Cohort                              | Treatment/ Outcomes              |
| Clinical factors associated with successful meniscal root repairs: a systematic review                                                                                                                                    | Jiang        | 2019 | 4                 | US          | Systematic review                   | Systematic review/ meta-analysis |
| Clinical outcomes of medial meniscus posterior root repair: a midterm follow-up study                                                                                                                                     | Furumatsu    | 2022 | 4                 | Japan       | Cohort                              | Treatment/ Outcomes              |
| Clinical, radiographic, and arthroscopic outcomes of surgical repair for radial and avulsed lesions on the lateral meniscus posterior root during acl reconstruction: a systematic review                                 | Zheng        | 2021 | 4                 | China       | Systematic review                   | Systematic review/ meta-analysis |
| Collagenous ultrastructure of the torn medial meniscus posterior root: a transmission electron microscopy study                                                                                                           | Seo          | 2019 | 5                 | South Korea | Descriptive laboratory human        | Preclinical                      |
| Combined repair of medial meniscal ramp lesions and posterior root tears of the lateral meniscus during anterior cruciate ligament reconstruction: a case report                                                          | Moran        | 2023 | 4                 | US          | Case report                         | Treatment/ Outcomes              |
| Comparative biomechanical study on contact alterations after lateral meniscus posterior root avulsion, transosseous reinsertion, and total meniscectomy                                                                   | Perez-Blanca | 2016 | 5                 | Spain       | Biomechanical human                 | Treatment/ Outcomes              |
| Comparison between conservative treatment and arthroscopic pull-out repair of the medial meniscus root tear and analysis of prognostic factors for the determination of repair indication                                 | Ahn          | 2015 | 3                 | South Korea | Comparative retrospective           | Treatment/ Outcomes              |
| Comparison of clinical and radiologic results between partial meniscectomy and refixation of medial meniscus posterior root tears: a minimum 5-year follow-up                                                             | Chung        | 2015 | 3                 | South Korea | Comparative retrospective           | Treatment/ Outcomes              |
| Comparison of long-term radiographic outcomes and rate and time for conversion to total knee arthroplasty between repair and meniscectomy for medial meniscus posterior root tears: a systematic review and meta-analysis | Krivicich    | 2022 | 4                 | US          | Systematic review and meta-analysis | Systematic review/ meta-analysis |
| Comparison of medial and lateral meniscus root tears                                                                                                                                                                      | Koo          | 2015 | 3                 | South Korea | Retrospective                       | Treatment/ Outcomes              |
| Comparison of medial and lateral tibial tunnel in pullout repair of posterior root tear of medial meniscus: radiologic, clinical, and arthroscopic outcomes                                                               | Kwon         | 2020 | 3                 | South Korea | Comparative retrospective           | Treatment/ Outcomes              |
| Comparison of the clinical outcomes of transtibial pull-out repair for medial meniscus posterior root tear: two simple stitches versus modified Mason-Allen suture                                                        | Hiranaka     | 2020 | 3                 | Japan       | Comparative retrospective           | Treatment/ Outcomes              |
| Comparison of the radiologic, arthroscopic, and clinical outcomes between repaired versus unrepaired medial meniscus posterior horn root tear during open wedge high tibial osteotomy                                     | Lee          | 2021 | 3                 | South Korea | Case control                        | Treatment/ Outcomes              |
| Comparison of tibiofemoral contact mechanics after various transtibial and all-inside fixation techniques for medial meniscus posterior root radial tears in a porcine model                                              | Chung        | 2018 | 5                 | South Korea | Biomechanical human                 | Treatment/ Outcomes              |
| Comparison of two simple stitches and modified Mason-Allen suture for medial meniscus posterior root tear based on the progression of meniscal posterior extrusion: a retrospective cohort study                          | Kintaka      | 2021 | 3                 | Japan       | Cohort                              | Treatment/ Outcomes              |
| Complete posterior lateral meniscal root lesion is associated with high-grade pivot-shift phenomenon in noncontact anterior cruciate ligament injuries                                                                    | Song         | 2017 | 4                 | China       | Case control                        | Treatment/ Outcomes              |
| Complete tear of the lateral meniscus posterior root is associated with meniscal extrusion in anterior cruciate ligament deficient knees                                                                                  | Kamatsuki    | 2018 | 4                 | Japan       | Comparative retrospective           | Treatment/ Outcomes              |
| Concomitant medial and lateral meniscus posterior horn root repair with ACL Reconstruction using trans-tibial tunnel technique                                                                                            | Shetty       | 2023 | 5                 | Singapore   | Technical note                      | Technical note                   |
| Concomitant posterior anchoring further reduces posterior meniscal extrusion during pullout repair of medial meniscus posterior root tears: a retrospective study                                                         | Xue          | 2022 | 3                 | Japan       | Comparative retrospective           | Treatment/ Outcomes              |

| Study Title                                                                                                                                                                                                                                       | Lead Author  | Year | Level of Evidence | Country     | Design                              | Theme                            |
|---------------------------------------------------------------------------------------------------------------------------------------------------------------------------------------------------------------------------------------------------|--------------|------|-------------------|-------------|-------------------------------------|----------------------------------|
| Concurrent arthroscopic meniscal repair during open-wedge high tibial osteotomy is not clinically beneficial for medial meniscus posterior root tears                                                                                             | Ke           | 2021 | 2                 | China       | Comparative prospective             | Treatment/ Outcomes              |
| Coronal extrusion of the lateral meniscus does not increase after pullout repair of the posterior root of the lateral meniscus at short-term follow-up                                                                                            | Forkel       | 2023 | 4                 | Germany     | Case series                         | Treatment/ Outcomes              |
| Correlation between meniscal extrusion and symptom duration, alignment, and arthritic changes in medial meniscus posterior root tear: research article                                                                                            | Kim          | 2020 | 3                 | South Korea | Observational                       | Treatment/ Outcomes              |
| Correlation of factors affecting correction of meniscal extrusion and outcome after medial meniscus root repair                                                                                                                                   | Sundararajan | 2022 | 4                 | India       | Case series                         | Treatment/ Outcomes              |
| Current concepts on posterior meniscal root lesion: a treatment algorithm based on the currently available evidence                                                                                                                               | Song         | 2014 | 5                 | China       | Review of current concepts          | Narrative review                 |
| Current reviews in musculoskeletal medicine: current controversies for treatment of meniscus root tears                                                                                                                                           | Lee          | 2022 | 5                 | US          | Review of current concepts          | Narrative review                 |
| Cyclic displacement after meniscal root repair fixation: a human biomechanical evaluation                                                                                                                                                         | LaPrade      | 2015 | 5                 | US          | Biomechanical human                 | Treatment/ Outcomes              |
| Degenerative meniscus lesions: an expert consensus statement using the modified Delphi technique                                                                                                                                                  | Hohmann      | 2020 | 5                 | Australia   | Delphi consensus panel              | Treatment/ Outcomes              |
| Description of a surgical technique of medial meniscus root repair: a fixation technique with two simple stitches under an expected initial tension                                                                                               | Okazaki      | 2019 | 5                 | Japan       | Technical note                      | Technical note                   |
| Developing an experimental model of early knee osteoarthritis after medial meniscus posterior root release: an in vivo study                                                                                                                      | Dzidzishvili | 2022 | 5                 | Spain       | Biomechanical human                 | Treatment/ Outcomes              |
| Development and analysis of mouse medial meniscus posterior root tear model                                                                                                                                                                       | Nukuto       | 2023 | 5                 | Japan       | Biomechanical human                 | Treatment/ Outcomes              |
| Diagnostic accuracy of 3.0 T magnetic resonance imaging for the detection of meniscus posterior root pathology                                                                                                                                    | LaPrade      | 2015 | 2                 | US          | Cohort                              | Diagnosis                        |
| Different effects of the lateral meniscus complete radial tear on the load distribution and transmission functions depending on the tear site                                                                                                     | Ohori        | 2021 | 5                 | Japan       | Biomechanical animal                | Treatment/ Outcomes              |
| Different patterns of lateral meniscus root tears in ACL injuries: application of a differentiated classification system                                                                                                                          | Forkel       | 2015 | 4                 | Germany     | Cohort                              | Treatment/ Outcomes              |
| Different suture materials for arthroscopic transtibial pull-out repair of medial meniscal posterior root tears: a human biomechanical study                                                                                                      | Nakama       | 2019 | 5                 | US          | Biomechanical human                 | Treatment/ Outcomes              |
| Distal fixation of meniscal root repair by transtibial pullout technique via transtibial tubercle fixation without hardware                                                                                                                       | Shohdy       | 2023 | 5                 | Kuwait      | Technical note                      | Technical note                   |
| Does meniscectomy have any advantage over conservative treatment in middle-aged patients with degenerative medial meniscus posterior root tear?                                                                                                   | Lee          | 2021 | 3                 | South Korea | Comparative retrospective           | Treatment/ Outcomes              |
| Does release of the superficial medial collateral ligament result in clinically harmful effects after the fixation of medial meniscus posterior root tears?                                                                                       | Chung        | 2017 | 4                 | South Korea | Case series                         | Treatment/ Outcomes              |
| Early osteoarthritis after untreated anterior meniscal root tears: an in vivo animal study                                                                                                                                                        | Steinman     | 2017 | 5                 | US          | Biomechanical human                 | Treatment/ Outcomes              |
| Early surgical repair of medial meniscus posterior root tear minimizes the progression of meniscal extrusion: 2-year follow-up of clinical and radiographic parameters after arthroscopic transtibial pull-out repair                             | Moon         | 2020 | 3                 | South Korea | Case series                         | Treatment/ Outcomes              |
| Effect of atelocollagen on the healing status after medial meniscal root repair using the modified Mason-Allen stitch                                                                                                                             | Lee          | 2020 | 3                 | South Korea | Comparative retrospective           | Treatment/ Outcomes              |
| Effect of concurrent repair of medial meniscal posterior root tears during high tibial osteotomy for medial osteoarthritis during short-term follow-up: a systematic review and meta-analysis                                                     | Kyun-Ho      | 2021 | 3                 | South Korea | Systematic review and meta-analysis | Systematic review/ meta-analysis |
| Effect of lateral meniscal root tear on the stability of the anterior cruciate ligament-deficient knee                                                                                                                                            | Shybut       | 2015 | 4                 | US          | Biomechanical human                 | Treatment/ Outcomes              |
| Effect of physical therapy on early knee osteoarthritis with medial meniscal posterior root assessed by MRI T2 mapping and 3D-to-2D registration technique: a prospective intervention study                                                      | Ikuta        | 2020 | 2                 | Japan       | Prospective study                   | Treatment/ Outcomes              |
| Effect of posterior horn medial meniscus root tear on in vivo knee kinematics                                                                                                                                                                     | Marsh        | 2014 | 3                 | US          | Cross sectional                     | Treatment/ Outcomes              |
| Effect of repair of radial tears at the root of the posterior horn of the medial meniscus with the pullout suture technique: a biomechanical study using porcine knees                                                                            | Seo          | 2009 | 5                 | South Korea | Biomechanical animal                | Treatment/ Outcomes              |
| Epidemiological features of acute medial meniscus posterior root tears                                                                                                                                                                            | Kamatsuki    | 2023 | 3                 | Japan       | Cohort                              | Treatment/ Outcomes              |
| Epidemiology of combined injuries of the secondary stabilizers in ACL-deficient knees: medial meniscal ramp lesion, lateral meniscus root tear, and ALL Tear: a prospective case series of 602 Patients With ACL tears from the SANTI Study Group | Gracia       | 2022 | 3                 | France      | Cross sectional                     | Diagnosis                        |
| Etiology of posterior meniscus root tears: medial vs. lateral                                                                                                                                                                                     | Karpinski    | 2023 | 3                 | Germany     | Cohort                              | Treatment/ Outcomes              |
| Evaluation of healing after medial meniscal root repair using second-look arthroscopy, clinical, and radiological criteria                                                                                                                        | Lee          | 2018 | 4                 | South Korea | Case series                         | Treatment/ Outcomes              |
| Evaluation of meniscal extrusion with posterior root disruption and repair using ultrasound                                                                                                                                                       | Rowland      | 2016 | 5                 | US          | Biomechanical human                 | Diagnosis                        |
| Evaluation of the all-inside technique for the repair of lateral meniscus root tears at 1 year after ACL reconstruction                                                                                                                           | Cuvillier    | 2023 | 3                 | France      | Cohort                              | Treatment/ Outcomes              |
| Evaluation of the bone tunnel position and state of healing on second-look arthroscopy after pullout repair of medial meniscus posterior root tear during open-wedge high tibial osteotomy                                                        | Yanagisawa   | 2023 | 4                 | Japan       | Cohort                              | Treatment/ Outcomes              |

| Study Title                                                                                                                                                                                                | Lead Author      | Year | Level of Evidence | Country     | Design                     | Theme               |
|------------------------------------------------------------------------------------------------------------------------------------------------------------------------------------------------------------|------------------|------|-------------------|-------------|----------------------------|---------------------|
| Evaluation, treatment, and outcomes of meniscal root tears: a critical analysis review                                                                                                                     | Strauss          | 2016 | 4                 | US          | Review of current concepts | Narrative review    |
| Factors related to meniscal extrusion and cartilage lesions in medial meniscus root tears                                                                                                                  | Jeon             | 2021 | 4                 | South Korea | Cohort                     | Treatment/ Outcomes |
| Failed transtibial pullout repair of the medial meniscus posterior root                                                                                                                                    | Wasilewski       | 2023 | 4                 | US          | Case report                | Treatment/ Outcomes |
| Functional, magnetic resonance imaging, and second-look arthroscopic outcomes after pullout repair for avulsion tears of the posterior lateral meniscus root                                               | Zhuo             | 2021 | 4                 | China       | Case series                | Treatment/ Outcomes |
| Global research status and hotspot analysis of meniscal root tears based on the WOS database                                                                                                               | Wang             | 2022 | 3                 | China       | Bibliometric analysis      | Narrative review    |
| Grade of subchondral insufficiency fracture of the knee and the presence of a posterior shiny-corner lesion are correlated with duration of medial meniscus posterior root tear in women                   | Okazaki          | 2022 | 4                 | Japan       | Case series                | Treatment/ Outcomes |
| Greater medial meniscus extrusion seen on ultrasonography indicates the risk of MRI-detected complete medial meniscus posterior root tear in a Japanese population with knee pain                          | Chiba            | 2022 | 4                 | Japan       | Cross sectional            | Diagnosis           |
| H-plasty repair technique improved tibiofemoral contact mechanics after repair for adjacent radial tears of posterior lateral meniscus root: a biomechanical study                                         | Zhang            | 2021 | 5                 | China       | Biomechanical human        | Treatment/ Outcomes |
| Healing of the torn anterior horn of rabbit medial meniscus to bone after transtibial pull-out repair and autologous platelet-rich plasma gel injection                                                    | Cui              | 2023 | 5                 | China       | Histological animal        | Treatment/ Outcomes |
| High body mass index is a risk factor for unfavorable clinical outcomes after medial meniscus posterior root repair in well-aligned knees                                                                  | Zhang            | 2021 | 3                 | Japan       | Comparative retrospective  | Treatment/ Outcomes |
| High prevalence of a deep lateral femoral notch sign in patients with anterior cruciate ligament (ACL) and concomitant posterior root tears of the lateral meniscus                                        | Berthold         | 2021 | 4                 | Germany     | Cohort                     | Diagnosis           |
| High rate of missed lateral meniscus posterior root tears on preoperative magnetic resonance imaging                                                                                                       | Krych            | 2018 | 4                 | US          | Case series                | Diagnosis           |
| High tibial osteotomy for medial meniscus posterior root tears in knees with moderate varus alignment can achieve favorable clinical outcomes                                                              | Itou             | 2022 | 4                 | Japan       | Cohort                     | Treatment/ Outcomes |
| Higher incidence of complete lateral meniscal root tears in revision compared with primary anterior cruciate ligament reconstruction                                                                       | Vial             | 2021 | 3                 | US          | Cohort                     | Treatment/ Outcomes |
| Histological analysis of repaired tissue after pullout repair of a medial meniscus posterior root tear                                                                                                     | Xue              | 2021 | 5                 | Japan       | Case report                | Treatment/ Outcomes |
| Histological evaluation of harvested specimen of a patient who underwent unicompartmental knee arthroplasty two years and six months after medial meniscus posterior root tear transtibial pull-out repair | Kubo             | 2021 | 5                 | Japan       | Case report                | Treatment/ Outcomes |
| How to perform concomitant medial meniscus pull-out repair with medial open-wedge high tibial osteotomy without technical failure                                                                          | Jin              | 2022 | 5                 | South Korea | Technical note             | Technical note      |
| ICRS scores worsen between 2-year short term and 5-year mid-term follow-up after transtibial medial meniscus root repair despite maintained functional outcomes                                            | Kaplan           | 2022 | 4                 | US          | Cohort                     | Treatment/ Outcomes |
| Improvement of clinical and radiological outcomes of root repair patients with advanced articular cartilage degeneration and osteoarthritis                                                                | Hopkins          | 2021 | 4                 | US          | Case series                | Treatment/ Outcomes |
| In situ repair of segmental loss posterior lateral meniscal root tears outperforms meniscofemoral ligament imbrication in the ACL reconstructed knee                                                       | Seiter           | 2023 | 5                 | US          | Biomechanical human        | Treatment/ Outcomes |
| Incidence and healing rates of meniscal tears in patients undergoing repair during the first stage of 2-stage revision anterior cruciate ligament reconstruction                                           | DePhillipo       | 2019 | 4                 | US          | Case series                | Treatment/ Outcomes |
| Increased cleft width during knee flexion is useful for the diagnosis of medial meniscus posterior root tears                                                                                              | Hiranaka         | 2022 | 3                 | Japan       | Case series                | Diagnosis           |
| Increased extrusion and ICRS grades at 2-year follow-up following transtibial medial meniscal root repair evaluated by MRI                                                                                 | Kaplan           | 2018 | 4                 | US          | Case series                | Treatment/ Outcomes |
| Increased medial femoral condyle angle and narrow intercondylar notch are associated with medial meniscus posterior root tear                                                                              | Altinayak        | 2023 | 3                 | Turkey      | Cohort                     | Treatment/ Outcomes |
| Increased posterior tibial slope results in increased incidence of posterior lateral meniscal root tears in ACL reconstruction patients                                                                    | Bernholt         | 2021 | 4                 | US          | Case control               | Treatment/ Outcomes |
| Influence of lateral meniscal posterior root avulsions and the meniscofemoral ligaments on tibiofemoral contact mechanics                                                                                  | Geeslin          | 2016 | 5                 | US          | Biomechanical human        | Treatment/ Outcomes |
| Initial biomechanical properties of transtibial meniscal root repair are improved by using a knotless anchor as a post-insertion tensioning device                                                         | Prado-Novoa      | 2020 | 5                 | Spain       | Biomechanical animal       | Treatment/ Outcomes |
| Injury patterns of medial meniscus posterior root tears                                                                                                                                                    | Furumatsu        | 2019 | 4                 | Japan       | Cohort                     | Diagnosis           |
| Injury to the posterior horn of the lateral meniscus from a misplaced tibial tunnel for anterior cruciate ligament reconstruction: a case report                                                           | Vadhera          | 2022 | 4                 | US          | Case report                | Treatment/ Outcomes |
| Investigating the chronology of meniscus root tears: do medial meniscus posterior root tears cause extrusion or the other way around?                                                                      | Krych            | 2020 | 4                 | US          | Case series                | Treatment/ Outcomes |
| Knee flexion-induced translation of pullout sutures used in the repair of medial meniscus posterior root tears                                                                                             | Xue              | 2021 | 4                 | Japan       | Retrospective              | Treatment/ Outcomes |
| Knee meniscus posterior root repair with FiberTak                                                                                                                                                          | Mesquita Queirós | 2022 | 5                 | Portugal    | Technical note             | Technical note      |
| Knotless anchors offer better prevention of meniscal excursion than knotted anchors: An experimental study of the bovine knee                                                                              | Eren             | 2020 | 5                 | Turkey      | Biomechanical animal       | Treatment/ Outcomes |
| Knotless medial meniscus posterior root repair                                                                                                                                                             | Tapasvi          | 2018 | 5                 | India       | Technical note             | Technical note      |

| Study Title                                                                                                                                                                                                 | Lead Author   | Year | Level of Evidence | Country     | Design                                | Theme                            |
|-------------------------------------------------------------------------------------------------------------------------------------------------------------------------------------------------------------|---------------|------|-------------------|-------------|---------------------------------------|----------------------------------|
| Knotless suture anchor repair of anterolateral meniscus root after iatrogenic injury                                                                                                                        | Robbins       | 2018 | 5                 | US          | Technical note                        | Technical note                   |
| Large lateral tibial slope and lateral-to-medial slope difference are risk factors for poorer clinical outcomes after posterolateral meniscus root tear repair in anterior cruciate ligament reconstruction | Wong          | 2022 | 3                 | China       | Retrospective                         | Treatment/ Outcomes              |
| Large meniscus extrusion ratio is a poor prognostic factor of conservative treatment for medial meniscus posterior root tear                                                                                | Kwak          | 2018 | 3                 | South Korea | Cohort                                | Treatment/ Outcomes              |
| Larger medial femoral to tibial condylar dimension may trigger posterior root tear of medial meniscus                                                                                                       | Chung         | 2016 | 3                 | South Korea | Case control                          | Treatment/ Outcomes              |
| Lateral meniscal posterior root repair with anterior cruciate ligament reconstruction better restores knee stability                                                                                        | Tang          | 2019 | 5                 | US          | Biomechanical human                   | Treatment/ Outcomes              |
| Lateral meniscal posterior root tears experience acceptable healing status after transtibial repair technique                                                                                               | Aga           | 2021 | 4                 | Norway      | Case series                           | Treatment/ Outcomes              |
| Lateral meniscus posterior root and meniscofemoral ligaments as stabilizing structures in the ACL-deficient knee: a biomechanical study                                                                     | Frank         | 2017 | 5                 | US          | Biomechanical human                   | Treatment/ Outcomes              |
| Lateral meniscus posterior root lesion influences anterior tibial subluxation of the lateral compartment in extension after anterior cruciate ligament injury                                               | Zheng         | 2020 | 3                 | China       | Cohort                                | Treatment/ Outcomes              |
| Lateral meniscus posterior root tear contributes to anterolateral rotational instability and meniscus extrusion in anterior cruciate ligament-injured patients                                              | Minami        | 2018 | 3                 | Japan       | Retrospective                         | Diagnosis                        |
| Lateral meniscus posterior root tear in anterior cruciate ligament injury can be detected using MRI-specific signs in combination but not individually                                                      | Asai          | 2020 | 4                 | Japan       | Retrospective                         | Diagnosis                        |
| Lateral meniscus root tear and meniscus extrusion with anterior cruciate ligament tear                                                                                                                      | Brody         | 2006 | 3                 | US          | Cohort                                | Diagnosis                        |
| Lateral-medial asymmetry of posterior tibial slope and small lateral tibial plateau articular surface depth are morphological factors of lateral meniscus posterior root tears in ACL-injured patients      | Yoshihara     | 2023 | 3                 | Japan       | Retrospective                         | Diagnosis                        |
| Long-term evaluation of posterior lateral meniscus root tears left in situ at the time of anterior cruciate ligament reconstruction                                                                         | Shelbourne    | 2011 | 3                 | US          | Cohort                                | Treatment/ Outcomes              |
| Loop-post construct, a novel technique for medial meniscus root repair                                                                                                                                      | Tahami        | 2020 | 5                 | Iran        | Technical note                        | Technical note                   |
| Loosening of posteromedial meniscal root repairs affects knee mechanics: a finite element study                                                                                                             | Steineman     | 2022 | 5                 | US          | Biomechanical finite element analysis | Treatment/ Outcomes              |
| Low reoperation rate following lateral meniscus root repair: clinical outcomes at 2 years follow-up                                                                                                         | De Leissègues | 2023 | 4                 | France      | Case series                           | Treatment/ Outcomes              |
| Magnetic resonance imaging evidence of meniscal extrusion in medial meniscus posterior root tear                                                                                                            | Choi          | 2010 | 4                 | South Korea | Case series                           | Diagnosis                        |
| Magnetic resonance imaging findings of surgically proven medial meniscus root tear: tear configuration and associated knee abnormalities                                                                    | Lee           | 2008 | 4                 | South Korea | Case series                           | Treatment/ Outcomes              |
| Magnetic resonance imaging of the meniscal roots                                                                                                                                                            | Sharif        | 2020 | 5                 | UK          | Review of current concepts            | Narrative review                 |
| Medial and lateral meniscus posterior root tears with an intact anterior cruciate ligament                                                                                                                  | Okazaki       | 2020 | 4                 | Japan       | Case report                           | Diagnosis                        |
| Medial joint space narrowing progresses after pullout of repair of medial meniscus posterior root tear                                                                                                      | Kawada        | 2023 | 4                 | Japan       | Case series                           | Treatment/ Outcomes              |
| Medial knee osteoarthritis precedes medial meniscal posterior root tear with an event of painful popping                                                                                                    | Lee           | 2018 | 4                 | South Korea | Case series                           | Diagnosis                        |
| Medial meniscal extrusion in patients with medial meniscus root tears: a systematic review and meta-analysis                                                                                                | Fong          | 2023 | 4                 | Singapore   | Systematic review and meta-analysis   | Systematic review/ meta-analysis |
| Medial meniscal extrusion of greater than 3 mm on ultrasound suggests combined medial meniscotibial ligament and posterior medial meniscal root tears: a cadaveric analysis                                 | Farivar       | 2023 | 5                 | US          | Biomechanical human                   | Preclinical                      |
| Medial meniscal posterior root avulsion fracture repair using the nice knot                                                                                                                                 | Revelt        | 2023 | 5                 | US          | Technical note                        | Technical note                   |
| Medial meniscal posterior root/horn radial tears correlate with cartilage degeneration detected by T1ρ relaxation mapping                                                                                   | Takahashi     | 2015 | 3                 | Japan       | Retrospective imaging                 | Diagnosis                        |
| Medial meniscal root repair using curved guide and soft suture anchor                                                                                                                                       | Lee           | 2018 | 5                 | South Korea | Technical note                        | Technical note                   |
| Medial meniscal root tears and meniscal extrusion transverse length ratios on MRI                                                                                                                           | Park          | 2012 | 3                 | South Korea | Retrospective imaging                 | Diagnosis                        |
| Medial meniscus extrusion correlates with disease duration of the sudden symptomatic medial meniscus posterior root tear                                                                                    | Furumatsu     | 2017 | 4                 | Japan       | Retrospective imaging                 | Treatment/ Outcomes              |
| Medial meniscus posterior root attachment injury and degeneration: MRI findings                                                                                                                             | Jones         | 2006 | 5                 | Australia   | Review of current concepts            | Narrative review                 |
| Medial meniscus posterior root reconstruction and open- wedge high tibial osteotomy for medial meniscus posterior root tear with varus knee: a case report                                                  | Ohno          | 2022 | 4                 | Japan       | Case report                           | Treatment/ Outcomes              |
| Medial meniscus posterior root repair decreases posteromedial extrusion of the medial meniscus during knee flexion                                                                                          | Okazaki       | 2020 | 3                 | Japan       | Cohort                                | Treatment/ Outcomes              |
| Medial meniscus posterior root repair influences sagittal length and coronal inclination of the anterior cruciate ligament: a retrospective study                                                           | Okazaki       | 2023 | 3                 | Japan       | Retrospective imaging                 | Treatment/ Outcomes              |
| Medial meniscus posterior root repair prevents the progression of subchondral insufficiency fracture of the knee                                                                                            | Okazaki       | 2021 | 3                 | Japan       | Cohort                                | Treatment/ Outcomes              |

| Study Title                                                                                                                                                                                                             | Lead Author    | Year | Level of Evidence | Country     | Design                                | Theme                            |
|-------------------------------------------------------------------------------------------------------------------------------------------------------------------------------------------------------------------------|----------------|------|-------------------|-------------|---------------------------------------|----------------------------------|
| Medial meniscus posterior root repair reduces the extruded meniscus volume during knee flexion with favorable clinical outcome                                                                                          | Zhang          | 2021 | 4                 | Japan       | Retrospective imaging                 | Treatment/ Outcomes              |
| Medial meniscus posterior root repair restores the intra-articular volume of the medial meniscus by decreasing posteromedial extrusion at knee flexion                                                                  | Okazaki        | 2020 | 4                 | Japan       | Retrospective imaging                 | Treatment/ Outcomes              |
| Medial meniscus posterior root repair using a modified Mason-Allen suture can prevent the progression of cartilage degeneration on the loading surface of the medial compartment: a second-look arthroscopic evaluation | Takihira       | 2021 | 4                 | Japan       | Case series                           | Treatment/ Outcomes              |
| Medial meniscus posterior root repair using a transtibial technique                                                                                                                                                     | Woodmass       | 2017 | 5                 | US          | Technical note                        | Technical note                   |
| Medial meniscus posterior root repairs: a comparison among three surgical techniques in short-term clinical outcomes and arthroscopic meniscal healing scores                                                           | Furumatsu      | 2022 | 3                 | Japan       | Comparative retrospective             | Treatment/ Outcomes              |
| Medial meniscus posterior root tear causes swelling of the medial meniscus and expansion of the extruded meniscus: a comparative analysis between 2D and 3D MRI                                                         | Okazaki        | 2020 | 3                 | Japan       | Case control                          | Diagnosis                        |
| Medial meniscus posterior root tear does not affect the outcome of medial open-wedge high tibial osteotomy                                                                                                              | Kim            | 2021 | 3                 | South Korea | Comparative retrospective             | Treatment/ Outcomes              |
| Medial meniscus posterior root tear induces pathological posterior extrusion of the meniscus in the knee-flexed position: an open magnetic resonance imaging analysis                                                   | Masuda         | 2018 | 4                 | Japan       | Case series                           | Treatment/ Outcomes              |
| Medial meniscus posterior root tear reconstructed with gracilis autograft improve healing rate and patient reported outcome measures                                                                                    | Li             | 2022 | 3                 | China       | Comparative retrospective             | Treatment/ Outcomes              |
| Medial meniscus posterior root tear repair using a 2-simple-suture pullout technique                                                                                                                                    | Samy           | 2017 | 5                 | Egypt       | Technical note                        | Technical note                   |
| Medial meniscus posterior root tear treatment: a matched cohort comparison of nonoperative management, partial meniscectomy, and repair                                                                                 | Bernard        | 2020 | 3                 | US          | Cohort                                | Treatment/ Outcomes              |
| Medial meniscus posterior root tear: a comprehensive review                                                                                                                                                             | Lee            | 2014 | 5                 | South Korea | Review of current concepts            | Narrative review                 |
| Medial meniscus posterior root tears and partial meniscectomy significantly increase stress in the knee joint during dynamic gait                                                                                       | Yang           | 2023 | 5                 | China       | Biomechanical finite element analysis | Treatment/ Outcomes              |
| Medial meniscus root repair: a transtibial pull-out surgical technique                                                                                                                                                  | Hevesi         | 2018 | 5                 | US          | Technical note                        | Technical note                   |
| Medial meniscus root tear in the middle aged patient: a case based review                                                                                                                                               | Carreau        | 2017 | 5                 | US          | Biomechanical human                   | Treatment/ Outcomes              |
| Medial meniscus root tear refixation: comparison of clinical, radiologic, and arthroscopic findings with medial meniscectomy                                                                                            | Kim            | 2011 | 3                 | South Korea | Comparative retrospective             | Treatment/ Outcomes              |
| Medial posterior meniscal root tears are associated with development or worsening of medial tibiofemoral cartilage damage: the multicenter osteoarthritis study                                                         | Guermazi       | 2013 | 3                 | US          | Cohort                                | Treatment/ Outcomes              |
| Medial versus lateral meniscus root tears: is there a difference in injury presentation, treatment decisions, and surgical repair outcomes?                                                                             | Krych          | 2020 | 3                 | US          | Comparative retrospective             | Treatment/ Outcomes              |
| Meniscal extrusion and spontaneous osteonecrosis with root tear of medial meniscus: comparison with horizontal tear                                                                                                     | Sung           | 2013 | 3                 | South Korea | Comparative retrospective             | Treatment/ Outcomes              |
| Meniscal extrusion measurements after posterior medial meniscus root tears: a systematic review and meta-analysis                                                                                                       | Farivar        | 2022 | 4                 | US          | Systematic review                     | Systematic review/ meta-analysis |
| Meniscal extrusion progresses shortly after the medial meniscus posterior root tear                                                                                                                                     | Furumatsu      | 2017 | 3                 | Japan       | Comparative retrospective             | Treatment/ Outcomes              |
| Meniscal extrusion under increasing varus in stress patients with a medial meniscus posterior root-tear                                                                                                                 | Beer           | 2022 | 3                 | Israel      | Comparative prospective               | Treatment/ Outcomes              |
| Meniscal extrusion, cartilage, bone, and ligament lesions associated with medial meniscus posterior root tear gap                                                                                                       | Dirim Mete     | 2023 | 3                 | Turkey      | Retrospective                         | Treatment/ Outcomes              |
| Meniscal ossicle: posttraumatic origin and association with posterior meniscal root tears                                                                                                                               | Mohankumar     | 2014 | 4                 | Canada      | Case series                           | Treatment/ Outcomes              |
| Meniscal root injuries                                                                                                                                                                                                  | Krych          | 2020 | 5                 | US          | Review of current concepts            | Narrative review                 |
| Meniscal root injury and spontaneous osteonecrosis of the knee                                                                                                                                                          | Robertson      | 2009 | 4                 | US          | Case series                           | Diagnosis                        |
| Meniscal root repair alone or combined with different procedures after at least 6 months of follow-up: a series of cases                                                                                                | Rocha de Faria | 2022 | 4                 | Brazil      | Case series                           | Treatment/ Outcomes              |
| Meniscal root repair along with auxiliary procedures for joint preservation: current concepts                                                                                                                           | Sundararajan   | 2021 | 5                 | India       | Review of current concepts            | Narrative review                 |
| Meniscal root repair with mini-open medial collateral ligament release                                                                                                                                                  | DeFroda        | 2021 | 5                 | US          | Technical note                        | Technical note                   |
| Meniscal root suturing techniques: implications for root fixation                                                                                                                                                       | Kopf           | 2011 | 5                 | US          | Biomechanical human                   | Treatment/ Outcomes              |
| Meniscal root tear repair: why, when and how?                                                                                                                                                                           | Bonasia        | 2015 | 5                 | Italy       | Review of current concepts            | Narrative review                 |
| Meniscal root tears evaluation and management                                                                                                                                                                           | Day            | 2018 | 5                 | US          | Review of current concepts            | Narrative review                 |
| Meniscal root tears: a classification system based on tear morphology                                                                                                                                                   | LaPrade        | 2015 | 4                 | US          | Case series                           | Diagnosis                        |



| Study Title                                                                                                                                                                                          | Lead Author | Year | Level of Evidence | Country     | Design                     | Theme                            |
|------------------------------------------------------------------------------------------------------------------------------------------------------------------------------------------------------|-------------|------|-------------------|-------------|----------------------------|----------------------------------|
| Meniscal root tears: a decade of research on their relevant anatomy, biomechanics, diagnosis, and treatment                                                                                          | Banovetz    | 2022 | 5                 | US          | Review of current concepts | Narrative review                 |
| Meniscal root tears: a silent epidemic                                                                                                                                                               | Cinque      | 2018 | 5                 | US          | Review of current concepts | Narrative review                 |
| Meniscal root tears: an update focused on preoperative and postoperative MRI findings                                                                                                                | Guimarães   | 2022 | 5                 | Brazil      | Review of current concepts | Narrative review                 |
| Meniscal root tears: current concepts review                                                                                                                                                         | Pache       | 2018 | 5                 | US          | Review of current concepts | Narrative review                 |
| Meniscal root tears: diagnosis and treatment                                                                                                                                                         | Koenig      | 2009 | 5                 | US          | Review of current concepts | Narrative review                 |
| Meniscal root tears: from basic science to ultimate surgery                                                                                                                                          | Papalia     | 2013 | 4                 | Italy       | Review of current concepts | Narrative review                 |
| Meniscal root tears: identification and repair                                                                                                                                                       | Doherty     | 2016 | 5                 | US          | Review of current concepts | Narrative review                 |
| Meniscal root tears: repair and salvage techniques                                                                                                                                                   | Homan       | 2023 | 5                 | US          | Review of current concepts | Narrative review                 |
| Meniscal root tears: significance, diagnosis, and treatment                                                                                                                                          | Bhatia      | 2014 | 5                 | US          | Review of current concepts | Narrative review                 |
| Meniscus extrusion is a predisposing factor for determining arthroscopic treatments in partial medial meniscus posterior root tears                                                                  | Furumatsu   | 2023 | 4                 | Japan       | Comparative retrospective  | Treatment/ Outcomes              |
| Meniscus root avulsion                                                                                                                                                                               | Marzo       | 2012 | 5                 | US          | Review of current concepts | Narrative review                 |
| Meniscus root repair                                                                                                                                                                                 | Vyas        | 2018 | 5                 | US          | Review of current concepts | Narrative review                 |
| Meniscus root repair                                                                                                                                                                                 | Navasartian | 2012 | 5                 | US          | Review of current concepts | Narrative review                 |
| Meniscus root repair vs meniscectomy or nonoperative management to prevent knee osteoarthritis after medial meniscus root tears: clinical and economic effectiveness                                 | Faucett     | 2019 | 4                 | US          | Systematic review          | Systematic review/ meta-analysis |
| Meniscus root tears: a clinical review                                                                                                                                                               | Randazzo    | 2022 | 5                 | US          | Review of current concepts | Narrative review                 |
| Midterm outcomes of posterior medial meniscus root tear repair: a systematic review                                                                                                                  | Chang       | 2022 | 4                 | US          | Systematic review          | Systematic review/ meta-analysis |
| Mild to moderate varus alignment in relation to surgical repair of a medial meniscus root tear: a matched-cohort controlled study with 2 years of follow-up                                          | Moon        | 2021 | 3                 | South Korea | Cohort                     | Treatment/ Outcomes              |
| Minimum 2-year clinical outcomes of medial meniscus root tears in relation to coronal alignment                                                                                                      | Ridley      | 2022 | 4                 | US          | Case series                | Treatment/ Outcomes              |
| Modified pull-out suture in posterior root tear of the medial meniscus: using a posteromedial portal                                                                                                 | Cho         | 2012 | 5                 | South Korea | Technical note             | Technical note                   |
| Morphological changes in the superficial medial collateral ligament on knee MR imaging: association with medial meniscal extrusion and posterior root medial meniscus abnormality                    | Yoon        | 2022 | 4                 | South Korea | Retrospective diagnostic   | Diagnosis                        |
| MR diagnosis of posterior root tears of the lateral meniscus using arthroscopy as the reference standard                                                                                             | De Smet     | 2009 | 4                 | US          | Retrospective diagnostic   | Diagnosis                        |
| MR findings of meniscal extrusion correlated with arthroscopy                                                                                                                                        | Magee       | 2008 | 4                 | US          | Retrospective diagnostic   | Diagnosis                        |
| MRI study of medial meniscus degeneration of osteoarthritic knees with or without posterior root tear                                                                                                | Hisashi     | 2022 | 3                 | Japan       | Cohort                     | Treatment/ Outcomes              |
| No dynamic extrusion of the medial meniscus in ultrasound examination in patients with confirmed root tear lesion                                                                                    | Karpinski   | 2019 | 3                 | Germany     | Cohort                     | Diagnosis                        |
| Non-anatomic repair of medial meniscus posterior root tears to the posterior capsule provided favourable outcomes in middle-aged and older patients                                                  | Zhu         | 2021 | 4                 | China       | Retrospective              | Treatment/ Outcomes              |
| Non-anatomical arthroscopic all-inside repair of medial meniscus posterior root tear to posterior cruciate ligament for patients with normal lower limb alignment                                    | Jiang       | 2022 | 4                 | China       | Retrospective              | Treatment/ Outcomes              |
| Non-operative management of medial meniscus posterior horn root tears is associated with worsening arthritis and poor clinical outcome at 5-year follow-up                                           | Krych       | 2017 | 4                 | US          | Cohort                     | Treatment/ Outcomes              |
| Non-operative treatment of degenerative posterior root tear of the medial meniscus                                                                                                                   | Lim         | 2010 | 4                 | South Korea | Retrospective              | Treatment/ Outcomes              |
| Novel posterior anchoring method associated with medial meniscus posterior root repair                                                                                                               | Okazaki     | 2022 | 5                 | Japan       | Technical note             | Technical note                   |
| Novel technique for repairing posterior medial meniscus root tears using porcine knees and biomechanical study                                                                                       | Wu          | 2018 | 5                 | Taiwan      | Biomechanical animal       | Treatment/ Outcomes              |
| Obesity is a risk factor for osteoarthritis progression and spontaneous osteoporosis is a risk for the development of spontaneous osteonecrosis in patients with medial meniscus posterior root tear | Takahashi   | 2021 | 3                 | Japan       | Retrospective              | Treatment/ Outcomes              |
| Osteomeniscal impact edema (OMIE): description of a distinct MRI finding in displaced flap tears of the medial meniscus, with comparison to posterior root tears                                     | Krych       | 2020 | 3                 | US          | Case series                | Diagnosis                        |
| Outcomes after surgical repair of medial meniscal root tears: a review                                                                                                                               | Edwards     | 2021 | 4                 | US          | Systematic review          | Systematic review/ meta-analysis |
| Outcomes of arthroscopic all-inside repair are improved compared to transtibial pull-out repair of medial meniscus posterior root tears                                                              | Yoon        | 2023 | 3                 | South Korea | Comparative retrospective  | Treatment/ Outcomes              |

| Study Title                                                                                                                                                                                             | Lead Author     | Year | Level of Evidence | Country     | Design                     | Theme               |
|---------------------------------------------------------------------------------------------------------------------------------------------------------------------------------------------------------|-----------------|------|-------------------|-------------|----------------------------|---------------------|
| Outcomes of arthroscopic all-inside repair versus observation in older patients with meniscus root tears                                                                                                | Dragoo          | 2020 | 2                 | US          | Cohort                     | Treatment/ Outcomes |
| Outcomes of arthroscopic posterior medial meniscus root repair: association with body mass index                                                                                                        | Brophy          | 2019 | 4                 | US          | Case series                | Treatment/ Outcomes |
| Outcomes of combined lateral meniscus posterior root repair and anterior cruciate ligament reconstruction                                                                                               | Shekhar         | 2022 | 2                 | India       | Cohort                     | Treatment/ Outcomes |
| Outcomes of medial meniscal posterior root repair during proximal tibial osteotomy: is root repair beneficial?                                                                                          | Lee             | 2020 | 3                 | South Korea | Cohort                     | Treatment/ Outcomes |
| Partial lateral meniscus anterior root injuries during anatomical single-bundle anterior cruciate ligament reconstruction are likely to occur in women with small skeletons                             | Shimozaki       | 2020 | 4                 | Japan       | Case series                | Treatment/ Outcomes |
| Partial meniscectomy for degenerative medial meniscal root tears shows favorable outcomes in well-aligned, nonarthritic knees                                                                           | Lee             | 2019 | 3                 | South Korea | Case control               | Treatment/ Outcomes |
| Partial meniscectomy provides no benefit for symptomatic degenerative medial meniscus posterior root tears                                                                                              | Krych           | 2018 | 3                 | US          | Comparative retrospective  | Treatment/ Outcomes |
| Partial meniscectomy provides the favorable outcomes for symptomatic medial meniscus tear with an intact posterior root                                                                                 | Kim             | 2020 | 4                 | South Korea | Case series                | Treatment/ Outcomes |
| Patients with meniscus posterolateral root tears repair during ACL reconstruction achieve comparable post-operative outcome than patients with isolated ACL reconstruction                              | Thomas          | 2023 | 3                 | France      | Cohort                     | Treatment/ Outcomes |
| Patterns and influencing factors of medial meniscus tears in varus knee osteoarthritis                                                                                                                  | Cho             | 2016 | 2                 | South Korea | Cohort                     | Treatment/ Outcomes |
| Peripheral stabilization suture to address meniscal extrusion in a revision meniscal root repair: surgical technique and rehabilitation protocol                                                        | Dean            | 2020 | 5                 | US          | Technical note             | Technical note      |
| Placement of an anatomic tibial tunnel significantly improves the medial meniscus posterior extrusion at 90° of knee flexion following medial meniscus posterior root pullout repair                    | Kamatsuki       | 2021 | 4                 | Japan       | Retrospective series       | Treatment/ Outcomes |
| Posterior horn lateral meniscal oblique radial tear in acute anterior cruciate ligament reconstruction incidence and outcomes after all-inside repair: clinical and second-look arthroscopic evaluation | Jeon            | 2022 | 4                 | South Korea | Case series                | Treatment/ Outcomes |
| Posterior horn medial meniscal root tear: the prequel                                                                                                                                                   | Umans           | 2014 | 3                 | US          | Cohort                     | Treatment/ Outcomes |
| Posterior lateral meniscal root and oblique radial tears: the biomechanical evidence supports repair of these tears, although long-term clinical studies are necessary                                  | LaPrade         | 2022 | 5                 | US          | Review of current concepts | Narrative review    |
| Posterior lateral meniscal root tear due to a malpositioned double-bundle anterior cruciate ligament reconstruction tibial tunnel                                                                       | LaPrade         | 2015 | 4                 | US          | Case report                | Diagnosis           |
| Posterior lateral meniscal root tears increase strain on the reconstructed anterior cruciate ligament: a cadaveric study                                                                                | Uffmann         | 2021 | 5                 | US          | Biomechanical human        | Treatment/ Outcomes |
| Posterior lateral meniscus root reattachment with suture anchors: an arthroscopic technique                                                                                                             | Cuéllar         | 2017 | 5                 | Spain       | Technical note             | Technical note      |
| Posterior medial meniscus root ligament lesions: MRI classification and associated findings                                                                                                             | Choi            | 2014 | 3                 | South Korea | Cohort                     | Diagnosis           |
| Posterior medial meniscus root repair using two transtibial tunnels with modified Mason-Allen stitches: a technical note                                                                                | Kim             | 2023 | 4                 | South Korea | Case series                | Treatment/ Outcomes |
| Posterior medial meniscus root tears potentiate the effect of increased tibial slope on anterior cruciate ligament graft forces                                                                         | Samuelsen       | 2020 | 5                 | US          | Biomechanical human        | Treatment/ Outcomes |
| Posterior meniscal root injuries                                                                                                                                                                        | Moatshe         | 2016 | 5                 | US          | Review of current concepts | Narrative review    |
| Posterior meniscal root repair using a meniscal suture device                                                                                                                                           | Rocha de Faria  | 2020 | 5                 | Brazil      | Technical note             | Technical note      |
| Posterior meniscal root repair: the transtibial double tunnel pullout technique                                                                                                                         | Chahla          | 2016 | 5                 | US          | Technical note             | Technical note      |
| Posterior meniscal root repairs: outcomes of an anatomic transtibial pull-out technique                                                                                                                 | LaPrade         | 2017 | 3                 | US          | Cohort                     | Treatment/ Outcomes |
| Posterior reattachment of a radial tear in the posterior root of the medial meniscus                                                                                                                    | Nha             | 2011 | 5                 | South Korea | Technical note             | Technical note      |
| Posterior root medial meniscus reconstruction: an option in chronic posterior root meniscal injury management                                                                                           | Prasertia       | 2018 | 4                 | Thailand    | Case report                | Treatment/ Outcomes |
| Posterior root medial meniscus tear with medial opening wedge high tibial osteotomy: a step-by-step systematic arthroscopic repair technique                                                            | Srimongkolpitak | 2022 | 5                 | Thailand    | Technical note             | Technical note      |
| Posterior root repair of medial meniscus combined with valgus opening wedge tibial osteotomy                                                                                                            | Rocha de Faria  | 2021 | 5                 | Brazil      | Technical note             | Technical note      |
| Posterior root tear fixation of the lateral meniscus combined with arthroscopic ACL double-bundle reconstruction: technical note of a transosseous fixation using the tibial PL tunnel                  | Forkel          | 2012 | 5                 | Germany     | Technical note             | Technical note      |
| Posterior root tear of the medial and lateral meniscus                                                                                                                                                  | Petersen        | 2014 | 5                 | Germany     | Review of current concepts | Narrative review    |
| Posterior root tears of the lateral meniscus                                                                                                                                                            | Feucht          | 2015 | 5                 | Germany     | Review of current concepts | Narrative review    |
| Posterior root tears of the lateral meniscus only affect tibiofemoral contact forces when the meniscofemoral ligament is involved: a cadaveric study                                                    | Sequeira        | 2023 | 5                 | US          | Biomechanical human        | Treatment/ Outcomes |

| Study Title                                                                                                                                                                                                                     | Lead Author  | Year | Level of Evidence | Country     | Design                              | Theme                            |
|---------------------------------------------------------------------------------------------------------------------------------------------------------------------------------------------------------------------------------|--------------|------|-------------------|-------------|-------------------------------------|----------------------------------|
| Postoperative external tibial rotation is correlated with inferior meniscal healing following pullout repair of a medial meniscus posterior root tear                                                                           | Hiranaka     | 2022 | 3                 | Japan       | Cohort                              | Treatment/ Outcomes              |
| Potential of the non-weight-bearing tunnel view in diagnosing medial meniscus posterior root tear: a pilot study of x-ray characteristics                                                                                       | Okamura      | 2021 | 3                 | Japan       | Cohort                              | Diagnosis                        |
| Predicting outcome of repair for posterior medial meniscus root tear with early osteoarthritis using bone SPECT/CT                                                                                                              | Whi          | 2019 | 3                 | South Korea | Cohort                              | Treatment/ Outcomes              |
| Predicting outcome of repair of medial meniscus posterior root tear with early osteoarthritis using bone single-photon emission computed tomography/computed tomography                                                         | Whi          | 2020 | 3                 | South Korea | Observational                       | Diagnosis                        |
| Predictive value of painful popping for a posterior root tear of the medial meniscus in middle-aged to older Asian patients                                                                                                     | Bae          | 2013 | 4                 | South Korea | Case series                         | Diagnosis                        |
| Predictors of degenerative medial meniscus extrusion: radial component and knee osteoarthritis                                                                                                                                  | Lee          | 2011 | 3                 | South Korea | Comparative retrospective           | Treatment/ Outcomes              |
| Preliminary diagnosis of medial meniscus posterior root tears using the Rosenberg radiographic view                                                                                                                             | Kodama       | 2019 | 4                 | Japan       | Comparative retrospective           | Diagnosis                        |
| Preoperative morphologic changes of the medial meniscus correlate with suture translations during knee flexion in pullout repair of medial meniscus posterior root tear                                                         | Hiranaka     | 2021 | 2                 | Japan       | Cohort                              | Treatment/ Outcomes              |
| Preoperative varus alignment and postoperative meniscus extrusion are the main long-term predictive factors of clinical failure of meniscal root repair                                                                         | Chung        | 2021 | 3                 | South Korea | Cohort                              | Treatment/ Outcomes              |
| Prevalence of lateral meniscal extrusion for posterior lateral meniscal root lesion with and without concomitant midbody radial tear in anterior cruciate ligament injury                                                       | Shen         | 2016 | 3                 | China       | Case control                        | Diagnosis                        |
| Prognostic factors and midterm clinical outcome of transtibial pullout and partial meniscectomy for medial meniscus posterior root tears in middle-aged patients                                                                | Dzidzishvili | 2022 | 3                 | Spain       | Case control                        | Treatment/ Outcomes              |
| Prognostic factors in the midterm results of pullout fixation for posterior root tears of the medial meniscus                                                                                                                   | Chung        | 2016 | 4                 | South Korea | Case series                         | Treatment/ Outcomes              |
| Prognostic factors of arthroscopic pull-out repair for a posterior root tear of the medial meniscus                                                                                                                             | Moon         | 2012 | 4                 | South Korea | Case series                         | Treatment/ Outcomes              |
| Progression of radiographic osteoarthritis after partial meniscectomy in degenerative medial meniscal posterior root tears was greater in varus- than in neutral-aligned knees: a minimum 5-year follow-up                      | Kim          | 2020 | 3                 | South Korea | Comparative retrospective           | Treatment/ Outcomes              |
| Prospective consecutive clinical outcomes after transtibial root repair for posterior meniscal root tears: a multicenter study                                                                                                  | Krych        | 2022 | 3                 | US          | Case control                        | Treatment/ Outcomes              |
| Pullout failure strength of the posterior horn of the medial meniscus with root ligament tear                                                                                                                                   | Kim          | 2013 | 2                 | South Korea | Prospective study                   | Treatment/ Outcomes              |
| Pullout fixation for medial meniscus posterior root tears: clinical results were not age-dependent, but osteoarthritis progressed                                                                                               | Chung        | 2019 | 3                 | South Korea | Case control                        | Treatment/ Outcomes              |
| Pullout fixation of posterior medial meniscus root tears: correlation between meniscus extrusion and midterm clinical results                                                                                                   | Chung        | 2017 | 3                 | South Korea | Case control                        | Treatment/ Outcomes              |
| Pullout repair associated with a bridging suture using FiberLink for the medial meniscus posterior horn/root tear                                                                                                               | Hiranaka     | 2021 | 5                 | Japan       | Technical note                      | Technical note                   |
| Pullout repair of a medial meniscus posterior root tear using a FasT-Fix all-inside suture technique                                                                                                                            | Kodama       | 2016 | 5                 | Japan       | Technical note                      | Technical note                   |
| Pullout repair of the medial meniscus posterior root tear reduces proton density-weighted imaging signal intensity of the medial meniscus                                                                                       | Okazaki      | 2018 | 4                 | Japan       | Cohort                              | Treatment/ Outcomes              |
| Pullout repair using modified Mason-Allen suture induces better meniscal healing and superior clinical outcomes: a comparison between two surgical methods                                                                      | Furumatsu    | 2019 | 3                 | Japan       | Cohort                              | Treatment/ Outcomes              |
| Quantifying the differential functional behavior between the medial and lateral meniscus after posterior meniscus root tears                                                                                                    | Walczak      | 2021 | 5                 | US          | Biomechanical human                 | Diagnosis                        |
| Radial tear of the medial meniscal root: reliability and accuracy of MRI for diagnosis                                                                                                                                          | Lee          | 2008 | 4                 | South Korea | Retrospective review                | Diagnosis                        |
| Radial tears associated with cleavage tears of the medial meniscus in athletes                                                                                                                                                  | Kidron       | 2002 | 4                 | Israel      | Retrospective review                | Treatment/ Outcomes              |
| Radial tears in the root of the posterior horn of the medial meniscus                                                                                                                                                           | Ozkoc        | 2008 | 4                 | Turkey      | Retrospective review                | Treatment/ Outcomes              |
| Radial tears in the roots of the posterior horns of both the medial and lateral menisci combined with anterior cruciate ligament tear: a case report                                                                            | Lee          | 2009 | 4                 | South Korea | Case report                         | Treatment/ Outcomes              |
| Radiographic OA, bone marrow lesions, higher body mass index and medial meniscal root tears are significantly associated with medial meniscus extrusion with OA or medial meniscal tears: a systematic review and meta-analysis | Zhan         | 2023 | 4                 | China       | Systematic review and meta-analysis | Systematic review/ meta-analysis |
| Remodified Mason-Allen suture technique concomitant with high tibial osteotomy for medial meniscus posterior root tears improved the healing of the repaired root and suppressed osteoarthritis progression                     | Kim          | 2021 | 4                 | South Korea | Retrospective review                | Treatment/ Outcomes              |
| Repair of meniscus root tear – is there a difference between medial meniscus root repair and lateral meniscus root repair? A systematic review and meta-analysis                                                                | Khoo         | 2023 | 4                 | China       | Systematic review and meta-analysis | Systematic review/ meta-analysis |
| Repair of the lateral posterior meniscal root improves stability in an ACL-deficient knee                                                                                                                                       | Forkel       | 2018 | 5                 | Germany     | Biomechanical human                 | Treatment/ Outcomes              |
| Repair of the posterior lateral meniscal root tear: suture anchor fixation through the outside-in anterior cruciate ligament reconstruction femoral tunnel                                                                      | Leyes        | 2021 | 5                 | Spain       | Technical note                      | Technical note                   |
| Repair of the posterior root of the medial meniscus                                                                                                                                                                             | Jones        | 2010 | 5                 | US          | Technical note                      | Technical note                   |

| Study Title                                                                                                                                                                                        | Lead Author    | Year | Level of Evidence | Country     | Design                    | Theme                               |
|----------------------------------------------------------------------------------------------------------------------------------------------------------------------------------------------------|----------------|------|-------------------|-------------|---------------------------|-------------------------------------|
| Repair versus nonrepair of medial meniscus posterior root tear: a systematic review of patients' selection criteria, including clinical and radiographic outcomes                                  | Lee            | 2020 | 4                 | South Korea | Systematic review         | Systematic review/<br>meta-analysis |
| Reprint of: outcomes of arthroscopic all-inside repair are improved compared to transtibial pull-out repair of medial meniscus posterior root tears                                                | Yoon           | 2023 | 3                 | South Korea | Cohort                    | Treatment/<br>Outcomes              |
| Results of arthroscopic all-inside repair for lateral meniscus root tear in patients undergoing concomitant anterior cruciate ligament reconstruction                                              | Ahn            | 2010 | 4                 | South Korea | Case series               | Treatment/<br>Outcomes              |
| Risk factors for lateral meniscus posterior root tears in the anterior cruciate ligament-injured knee: an epidemiological analysis of 3956 patients from the SANTI Study Group                     | Praz           | 2019 | 3                 | France      | Case control              | Treatment/<br>Outcomes              |
| Risk factors for medial meniscus posterior root tear                                                                                                                                               | Hwang          | 2012 | 3                 | South Korea | Cohort                    | Treatment/<br>Outcomes              |
| Risk factors for posterior lateral meniscus root tears in anterior cruciate ligament injuries                                                                                                      | Feucht         | 2015 | 4                 | Germany     | Cohort                    | Treatment/<br>Outcomes              |
| Risk of interference between the tibial tunnel and locking screws in medial meniscus posterior root repair and open wedge high tibial osteotomy                                                    | Nejima         | 2022 | 4                 | Japan       | Simulation                | Treatment/<br>Outcomes              |
| Role of musculoskeletal ultrasound in assessment of extrusion of the medial meniscus of the knee joint compared to MRI as a reference standard                                                     | Elkwesny       | 2020 | 2                 | Egypt       | Cohort                    | Diagnosis                           |
| Role of nonoperative treatment in managing degenerative tears of the medial meniscus posterior root                                                                                                | Neogi          | 2013 | 2                 | India       | Cohort                    | Treatment/<br>Outcomes              |
| Role of the anterior cruciate ligament, anterolateral complex, and lateral meniscus posterior root in anterolateral rotatory knee instability: a biomechanical study                               | Willinger      | 2023 | 5                 | UK          | Biomechanical human       | Treatment/<br>Outcomes              |
| Role of the mechanical axis of lower limb and body weight in the horizontal tear and root ligament tear of the posterior horn of the medial meniscus                                               | Kim            | 2012 | 3                 | South Korea | Comparative retrospective | Diagnosis                           |
| Root avulsion and para-root tear of the posterolateral meniscus: repair versus untreated                                                                                                           | Keyhani        | 2018 | 3                 | Iran        | Case control              | Treatment/<br>Outcomes              |
| Root repair versus partial meniscectomy for medial meniscus posterior root tears: comparison of long-term survivorship and clinical outcomes at minimum 10-year follow-up                          | Chung          | 2020 | 3                 | South Korea | Cohort                    | Treatment/<br>Outcomes              |
| Root tear of the meniscus: biomechanical evaluation of an arthroscopic refixation technique                                                                                                        | Rosslensbroich | 2013 | 5                 | Germany     | Biomechanical animal      | Treatment/<br>Outcomes              |
| Second-look arthroscopic assessment and clinical results of modified pull-out suture for posterior root tear of the medial meniscus                                                                | Cho            | 2014 | 3                 | South Korea | Cohort                    | Treatment/<br>Outcomes              |
| Second-look arthroscopic findings after medial open-wedge high tibial osteotomy combined with all-inside repair of medial meniscus posterior root tears                                            | Jing           | 2020 | 3                 | China       | Cohort                    | Treatment/<br>Outcomes              |
| Second-look arthroscopic findings after open wedging high tibia osteotomy focusing on the posterior root tears of the medial meniscus                                                              | Nha            | 2013 | 4                 | South Korea | Case series               | Treatment/<br>Outcomes              |
| Second-look arthroscopic findings after repairs of posterior root tears of the medial meniscus                                                                                                     | Seo            | 2011 | 4                 | South Korea | Case series               | Treatment/<br>Outcomes              |
| Semi-quantitative arthroscopic scoring system is related to clinical outcomes in patients after medial meniscus posterior root repair                                                              | Zhang          | 2022 | 4                 | Japan       | Case series               | Diagnosis                           |
| Shared ACL bone tunnel technique for repair of lateral meniscus posterior root tears combined With ACL reconstruction                                                                              | Zhou           | 2022 | 3                 | China       | Cohort                    | Treatment/<br>Outcomes              |
| Short-term results and surgical technique of arthroscopic centralization as an augmentation for medial meniscus extrusion caused by medial meniscus posterior root tear                            | Mochizuki      | 2021 | 4                 | Japan       | Case series               | Treatment/<br>Outcomes              |
| Simple medial meniscus posterior horn root repair using an all-inside meniscal repair device combined with high tibial osteotomy to maintain joint-space width in a patient with a repairable tear | Suh            | 2021 | 3                 | South Korea | Cohort                    | Treatment/<br>Outcomes              |
| Simplified arthroscopic lateral meniscal root repair involving the use of 2 cinch-loop sutures                                                                                                     | Smith          | 2017 | 5                 | US          | Technical note            | Technical note                      |
| Simultaneous avulsion fracture of the posterior medial and posterior lateral meniscus root: a case report and review of the literature                                                             | Feucht         | 2014 | 4                 | Germany     | Case report               | Narrative review                    |
| Simultaneous correction of varus deformity and posterior tibial slope by modified hybrid closed-wedge high tibial osteotomy                                                                        | Koga           | 2022 | 5                 | Japan       | Technical note            | Technical note                      |
| Six-month outcomes of clinically relevant meniscal injury in a large-animal model                                                                                                                  | Bansal         | 2021 | 5                 | US          | Biomechanical animal      | Treatment/<br>Outcomes              |
| Stable lateral meniscal posterior root tears left in situ at time of anterior cruciate ligament reconstruction are of minimal long-term clinical detriment                                         | Shumborski     | 2021 | 3                 | Australia   | Comparative retrospective | Treatment/<br>Outcomes              |
| Steep lateral tibial slope and lateral-to-medial slope asymmetry are risk factors for concomitant posterolateral meniscus root tears in anterior cruciate ligament injuries                        | Kolbe          | 2019 | 4                 | Germany     | Cohort                    | Treatment/<br>Outcomes              |
| Steep medial tibial slope and prolonged delay to surgery are associated with bilateral medial meniscus posterior root tear                                                                         | Hiranaka       | 2021 | 3                 | Japan       | Cohort                    | Diagnosis                           |
| Steep posterior slope and shallow concave shape of the medial tibial plateau are risk factors for medial meniscus posterior root tears                                                             | Okazaki        | 2021 | 3                 | Japan       | Case control              | Treatment/<br>Outcomes              |
| Steep posterior slope of the medial tibial plateau and anterior cruciate ligament degeneration contribute to medial meniscus posterior root tears in young patients                                | Kodama         | 2023 | 3                 | Japan       | Comparative retrospective | Treatment/<br>Outcomes              |
| Stress radiography findings in medial meniscus posterior root tears                                                                                                                                | Argin          | 2020 | 3                 | Turkey      | Comparative retrospective | Diagnosis                           |
| Subchondral insufficiency fracture is a predictive factor of osteoarthritis progression and conversion to arthroplasty in non-surgically treated medial meniscus root tear                         | Choi           | 2023 | 4                 | South Korea | Cohort                    | Treatment/<br>Outcomes              |

| Study Title                                                                                                                                                                                          | Lead Author | Year | Level of Evidence | Country     | Design                                | Theme                           |
|------------------------------------------------------------------------------------------------------------------------------------------------------------------------------------------------------|-------------|------|-------------------|-------------|---------------------------------------|---------------------------------|
| Suprameniscal portal for repairing meniscal root tears                                                                                                                                               | Seifeldin   | 2021 | 5                 | Egypt       | Technical note                        | Technical note                  |
| Surgical treatment of combined posterior root tears of the lateral meniscus and ACL tears                                                                                                            | Pan         | 2015 | 3                 | China       | Cohort                                | Treatment/Outcomes              |
| Surgical treatment of complex meniscus tear and disease: state of the art                                                                                                                            | Ozeki       | 2021 | 5                 | Japan       | Review of current concepts            | Narrative review                |
| Survivorship analysis and clinical outcomes of transtibial pullout repair for medial meniscus posterior root tears: a 5- to 10-year follow-up study                                                  | Chung       | 2018 | 4                 | South Korea | Case series                           | Treatment/Outcomes              |
| Suture anchor refixation of meniscal root tears without an additional portal                                                                                                                         | Balke       | 2018 | 5                 | Germany     | Technical note                        | Technical note                  |
| Suture anchor repair for a medial meniscus posterior root tear combined with arthroscopic meniscal centralization and open wedge high tibial osteotomy                                               | Nakamura    | 2018 | 5                 | Japan       | Technical note                        | Technical note                  |
| Suture configuration techniques have no effect on mid-term clinical outcomes of arthroscopic meniscus root repairs                                                                                   | Ulku        | 2020 | 3                 | Turkey      | Cohort                                | Treatment/Outcomes              |
| Suture repair of full radial posterior lateral meniscus tears using a central midline portal                                                                                                         | Ouanazar    | 2017 | 5                 | UK          | Technical note                        | Technical note                  |
| Tear gap and severity of osteoarthritis are associated with meniscal extrusion in degenerative medial meniscus posterior root tears                                                                  | Kim         | 2019 | 3                 | South Korea | Comparative retrospective             | Treatment/Outcomes              |
| Technique for transtibial knotless repair of lateral meniscus root avulsion                                                                                                                          | Harnden     | 2017 | 5                 | US          | Technical note                        | Technical note                  |
| Tensile forces on repaired medial meniscal root tears                                                                                                                                                | Stärke      | 2013 | 5                 | Germany     | Biomechanical human                   | Treatment/Outcomes              |
| Tensile strength of the pullout repair technique for the medial meniscus posterior root tear: a porcine study                                                                                        | Fujii       | 2017 | 5                 | Japan       | Biomechanical animal                  | Treatment/Outcomes              |
| The accuracy of a newly developed guide system in medial meniscus posterior root repair: a comparison between two aiming guides                                                                      | Furumatsu   | 2019 | 4                 | Japan       | Comparative retrospective             | Treatment/Outcomes              |
| The biomechanical effect of a lateral meniscus posterior root tear with and without damage to the meniscomfemoral ligament: efficacy of different repair techniques                                  | Forkel      | 2014 | 5                 | Germany     | Biomechanical human                   | Treatment/Outcomes              |
| The clinical and radiographic outcomes of type 2 medial meniscus posterior root tears following transtibial pullout repair                                                                           | Hiranaka    | 2023 | 3                 | Japan       | Comparative retrospective             | Treatment/Outcomes              |
| The degeneration of meniscus roots is accompanied by fibrocartilage formation, which may precede meniscus root tears in osteoarthritic knees                                                         | Park        | 2015 | 3                 | South Korea | Cross sectional                       | Diagnosis                       |
| The distance between the tibial tunnel aperture and meniscal root attachment is correlated with meniscal healing status following transtibial pullout repair for medial meniscus posterior root tear | Hiranaka    | 2020 | 3                 | Japan       | Cohort                                | Treatment/Outcomes              |
| The early arthroscopic pullout repair of medial meniscus posterior root tear is more effective for reducing medial meniscus extrusion                                                                | Kamatsuki   | 2019 | 3                 | Japan       | Cohort                                | Treatment/Outcomes              |
| The effect of complete radial lateral meniscus posterior root tear on the knee contact mechanics: a finite element analysis                                                                          | Bao         | 2013 | 5                 | China       | Biomechanical finite element analysis | Treatment/Outcomes              |
| The effects of different repair methods for a posterior root tear of the lateral meniscus on the biomechanics of the knee: a finite element analysis                                                 | Wang        | 2021 | 5                 | China       | Biomechanical finite element analysis | Treatment/Outcomes              |
| The effects of lateral meniscus posterior root tear and its repair on knee stability of internal rotation and forward shift: a biomechanical kinematics cadaver study                                | Qi          | 2021 | 5                 | China       | Biomechanical human                   | Treatment/Outcomes              |
| The effects of lateral meniscus posterior root tears or repair with anterior cruciate ligament reconstruction on the pressure of the patellofemoral joint: A biomechanical evaluation                | Zhang       | 2023 | 5                 | China       | Descriptive laboratory human          | Treatment/Outcomes              |
| The efficacy of medial meniscal posterior root tear repair with or without high tibial osteotomy: a systematic review                                                                                | Wang        | 2023 | 3                 | China       | Systematic review                     | Systematic review/meta-analysis |
| The efficacy of meniscus posterior root tears repair: a systematic review and meta-analysis                                                                                                          | Wang        | 2021 | 3                 | China       | Systematic review                     | Systematic review/meta-analysis |
| The functional impact of home-based self-rehabilitation following arthroscopic meniscus root repair                                                                                                  | Tahami      | 2022 | 4                 | Iran        | Historically controlled study         | Rehabilitation                  |
| The knee meniscus: management of traumatic tears and degenerative lesions                                                                                                                            | Beaufils    | 2017 | 5                 | France      | Review of current concepts            | Narrative review                |
| The lateral meniscus extrudes with and without root tear evaluated using ultrasound                                                                                                                  | Diermeier   | 2022 | 5                 | US          | Biomechanical human                   | Diagnosis                       |
| The lateral meniscus posterior root and meniscomfemoral ligaments are stabilizing structures in the ACL deficient knee: a biomechanical study                                                        | Moatshe     | 2017 | 5                 | US          | Biomechanical human                   | Treatment/Outcomes              |
| The meniscal ossicle associated with medial meniscus posterior root tear                                                                                                                             | Qalib       | 2022 | 4                 | China       | Case report                           | Diagnosis                       |
| The MRI findings of meniscal root tear of the medial meniscus: emphasis on coronal, sagittal and axial images                                                                                        | Choi        | 2012 | 3                 | China       | Diagnostic study                      | Diagnosis                       |
| The natural history of medial meniscal root tears: a biomechanical and clinical case perspective                                                                                                     | Floyd       | 2021 | 4                 | US          | Case series                           | Treatment/Outcomes              |
| The oblique meniscomeniscal ligament: a case report of a rare obstruction to meniscal root repair                                                                                                    | Floyd       | 2021 | 4                 | US          | Case report                           | Treatment/Outcomes              |
| The optimal suture site for the repair of posterior horn root tears: biomechanical evaluation of pullout strength in porcine menisci                                                                 | Kim         | 2016 | 5                 | South Korea | Biomechanical human                   | Treatment/Outcomes              |
| The role of medial meniscus posterior root tear and proximal tibial morphology in the development of spontaneous osteonecrosis and osteoarthritis of the knee                                        | Yamagami    | 2017 | 3                 | Japan       | Cohort                                | Treatment/Outcomes              |

| Study Title                                                                                                                                                                                                                                          | Lead Author  | Year | Level of Evidence | Country     | Design                     | Theme                               |
|------------------------------------------------------------------------------------------------------------------------------------------------------------------------------------------------------------------------------------------------------|--------------|------|-------------------|-------------|----------------------------|-------------------------------------|
| The role of meniscal tears in spontaneous osteonecrosis of the knee: a systematic review of suspected etiology and a call to revisit nomenclature                                                                                                    | Hussain      | 2019 | 3                 | US          | Systematic review          | Systematic review/<br>meta-analysis |
| The role of MRI in evaluation of arthroscopic transtibial pullout repair for medial meniscus posterior root tears                                                                                                                                    | de Oliveira  | 2021 | 5                 | Brazil      | Review of current concepts | Narrative review                    |
| The role of suture cutout in the failure of meniscal root repair during the early post-operative period: a biomechanical study                                                                                                                       | Perez-Blanca | 2018 | 5                 | Spain       | Biomechanical human        | Treatment/<br>Outcomes              |
| The stability of repaired meniscal root can affect postoperative cartilage status following medial meniscus posterior root repair                                                                                                                    | Zhang        | 2022 | 4                 | Japan       | Case series                | Treatment/<br>Outcomes              |
| There is no difference in radiographic outcomes after average 9 years after arthroscopic partial medial meniscectomy for both posterior horn tears and posterior horn root tears                                                                     | Kwon         | 2020 | 3                 | South Korea | Comparative retrospective  | Treatment/<br>Outcomes              |
| Tibiofemoral contact mechanics following posterior root of medial meniscus tear, repair, meniscectomy, and allograft transplantation                                                                                                                 | Kim          | 2013 | 5                 | South Korea | Biomechanical human        | Treatment/<br>Outcomes              |
| Time-dependent increase in medial meniscus extrusion after medial meniscus posterior root tear analyzed by using magnetic resonance imaging                                                                                                          | Okazaki      | 2019 | 3                 | Japan       | Cross sectional            | Diagnosis                           |
| Trans-posterior cruciate ligament all-inside root repair versus partial meniscectomy for medial meniscus posterior root tears: comparison of semiquantitative and quantitative MRI outcomes in cartilage degeneration and osteoarthritic progression | Su           | 2022 | 3                 | China       | Comparative retrospective  | Treatment/<br>Outcomes              |
| Transosseous medial meniscal root repair using a modified Mason-Allen suture configuration                                                                                                                                                           | Lavender     | 2015 | 5                 | US          | Technical note             | Technical note                      |
| Transtibial fixation for medial meniscus posterior root tear reduces posterior extrusion and physiological translation of the medial meniscus in middle-aged and elderly patients                                                                    | Kodama       | 2020 | 4                 | Japan       | Retrospective              | Treatment/<br>Outcomes              |
| Transtibial pull-out repair of converted radial tear adjacent to medial meniscus root                                                                                                                                                                | Yin          | 2020 | 5                 | US          | Technical note             | Technical note                      |
| Transtibial pull-out repair of lateral meniscus posterior root is beneficial for graft maturation after anterior cruciate ligament reconstruction: a retrospective study                                                                             | Li           | 2022 | 3                 | China       | Cohort                     | Treatment/<br>Outcomes              |
| Transtibial pullout repair of lateral meniscus posterior root tear with tissue loss: a case with anterior cruciate ligament injury and medial meniscus tear                                                                                          | Tamura       | 2022 | 4                 | Japan       | Case report                | Treatment/<br>Outcomes              |
| Transtibial pullout repair of medial meniscus posterior root tear restores physiological rotation of the tibia in the knee-flexed position                                                                                                           | Okazaki      | 2019 | 3                 | Japan       | Comparative retrospective  | Treatment/<br>Outcomes              |
| Transtibial pullout repair of medial meniscus posterior root tears: effects on the meniscus healing score and ICRS grade among patients with mild osteoarthritis of the knee                                                                         | Kodama       | 2021 | 4                 | Japan       | Retrospective              | Treatment/<br>Outcomes              |
| Transtibial pullout repair of the lateral meniscus posterior root tear combined with anterior cruciate ligament reconstruction reduces lateral meniscus extrusion: a retrospective study                                                             | Okazaki      | 2020 | 3                 | Japan       | Comparative retrospective  | Treatment/<br>Outcomes              |
| Transtibial pullout repair reduces posterior extrusion of the medial meniscus                                                                                                                                                                        | Masuda       | 2019 | 4                 | Japan       | Retrospective              | Treatment/<br>Outcomes              |
| Transtibial pullout repair techniques using two simple stitches for medial meniscus posterior root tear can prevent the progression of medial meniscus extrusion and obtain successful outcomes                                                      | Hiranaka     | 2022 | 2                 | Japan       | Cohort                     | Treatment/<br>Outcomes              |
| Traumatic posterior root tear of the medial meniscus in patients with severe medial instability of the knee                                                                                                                                          | Ra           | 2015 | 4                 | South Korea | Case series                | Treatment/<br>Outcomes              |
| Treatment outcomes of meniscal root tears: a systematic review                                                                                                                                                                                       | Stein        | 2020 | 4                 | US          | Systematic review          | Systematic review/<br>meta-analysis |
| Two simple stitches for medial meniscus posterior root repair prevents the progression of meniscal extrusion and reduces intrameniscal signal intensity better than modified Mason-Allen sutures                                                     | Okazaki      | 2021 | 4                 | Japan       | Retrospective              | Treatment/<br>Outcomes              |
| Type II medial meniscus root repair with peripheral release for addressing meniscal extrusion                                                                                                                                                        | DePhillipo   | 2019 | 5                 | US          | Technical note             | Technical note                      |
| Unfavorable results of partial meniscectomy for complete posterior medial meniscus root tear with early osteoarthritis: a 5- to 8-year follow-up study                                                                                               | Han          | 2010 | 4                 | India       | Therapeutic                | Treatment/<br>Outcomes              |
| Utilization of transtibial centralization suture best minimizes extrusion and restores tibiofemoral contact mechanics for anatomic medial meniscal root repairs in a cadaveric model                                                                 | Daney        | 2019 | 5                 | US          | Biomechanical human        | Treatment/<br>Outcomes              |
| Varus stress MRI in diagnosis of medial meniscal posterior root tear                                                                                                                                                                                 | Qardash      | 2022 | 4                 | Egypt       | Prospective study          | Diagnosis                           |
| Volumetric assessment of extrusion in medial meniscus posterior root tears through semi-automatic segmentation on 3-tesla magnetic resonance images                                                                                                  | Kim          | 2020 | 3                 | South Korea | Case control               | Diagnosis                           |
| Younger patients, lower BMI, complete meniscus root healing, lower HKA degree and shorter preoperative symptom duration were the independent risk factors correlated with the good correction of MME in patients with repaired MMPRTs                | Nie          | 2023 | 4                 | China       | Cohort                     | Treatment/<br>Outcomes              |
